1 ***Schistosoma mansoni* infection reprograms the metabolic potential of the myeloid lineage in**  
2 **a mouse model of metabolic syndrome**

3  
4  
5 Diana Cortes-Selva<sup>1</sup>, Lisa Gibbs<sup>1</sup>, J. Alan Maschek<sup>5,6</sup>, Tyler Van Ry<sup>3,5</sup>, Bartek Rajwa<sup>2</sup>, James E.  
6 Cox<sup>3,5</sup>, Eyal Amiel<sup>4</sup>, Keke C. Fairfax<sup>1,7</sup>

7  
8 <sup>1</sup> Department of Pathology, Division of Microbiology and Immunology,  
9 University of Utah, Salt Lake City UT, 84112

10 <sup>2</sup> Bindley Bioscience Center, Purdue University, West Lafayette IN, 47907

11 <sup>3</sup> Department of Biochemistry, University of Utah, Salt Lake City UT, 84112

12 <sup>4</sup> Department of Biomedical and Health Sciences, University of Vermont, Burlington, VT 05405

13 <sup>5</sup>Metabolomics, Proteomics and Mass Spectrometry Cores, University of Utah, Salt Lake City, UT,  
14 84112

15 <sup>6</sup> Department of Nutrition and Integrative Physiology and the Diabetes and Metabolism  
16 Research Center, University of Utah, Salt Lake City, UT 84112

17

18

19 Running title: Schistosomes reprogram myeloid metabolism

20

21

22 <sup>7</sup>Lead contact:

23 Keke Fairfax

24 Department of Pathology

25 Division of Microbiology and Immunology

26 University of Utah

27 JMRB 2200B

28 15 N Medical Drive East

29 Salt Lake City, UT 84112

30 Email: [keke.fairfax@path.utah.edu](mailto:keke.fairfax@path.utah.edu)

31 ORCID: <https://orcid.org/0000-0002-8382-2960>

32 801-581-5980 (office)

33

34

35

36

37 Keywords: Myeloid lineage, macrophage metabolism, *Schistosoma mansoni*, biological sex,  
38 metabolic disease

39

40

41

42

43

## 44 **Summary**

45  
46 Despite evidence that helminths protect from metabolic disease, a major gap exists in  
47 understanding the underlying mechanism(s). Here we demonstrate that bone marrow derived  
48 macrophages (BMDM) from *S. mansoni* infected male ApoE<sup>-/-</sup> mice have dramatically increased  
49 mitochondrial respiration compared to those from uninfected mice. This change associates with  
50 increased glucose and palmitate shuttling into TCA cycle intermediates and decreased  
51 accumulation of cellular cholesterol esters. Moreover, systemic metabolic modulation by  
52 schistosomes is a function of biological sex, where infection protects ApoE<sup>-/-</sup> male, but not  
53 female, mice from obesity and glucose intolerance. Sex-dependence extends to myeloid cells,  
54 where reprogramming leads to opposite cholesterol phenotypes in BMDM from females and  
55 males. Finally, the metabolic reprogramming of male myeloid cells is transferrable via bone  
56 marrow transplantation to an uninfected host, indicating maintenance of reprogramming in the  
57 absence of sustained antigen exposure. This work reveals that *S. mansoni* systemic reprogramming  
58 of myeloid metabolism is sex-dependent.

59

## 60 **Introduction**

61  
62 Cardiovascular disease (CVD) is the leading worldwide cause of mortality (Hinton et al., 2018;  
63 Roth et al., 2017). In the United States, 65% of adults diagnosed with diabetes have elevated  
64 LDL cholesterol levels or take cholesterol lowering medications, and death rates from  
65 atherosclerotic cardiovascular disease (CVD) are ~1.7 times higher in this population as  
66 compared to non-diabetic adults (Emerging Risk Factors et al., 2010). It is well established that  
67 in the diabetic population, obesity, and dyslipidemia are risk factors underlying these increases in

68 mortality, while hyperglycemia is an independent risk factor (Marks and Raskin, 2000; Wong et  
69 al., 2016). Underlying conditions such as diabetes and atherosclerosis contribute to the burden of  
70 CVD in both females and males. While, the incidence of CVD is markedly higher in men than in  
71 age-matched women (Opotowsky et al., 2007; Tan et al., 2010), the risk of developing CVD  
72 while diabetic is much greater in women than men (Humphries et al., 2017; Peters et al., 2014).  
73 In non-diabetic patients, females exhibit increased insulin sensitivity in comparison to males, as  
74 well as reduced prevalence of dysglycemia and enhanced muscle glucose uptake (Cnop et al.,  
75 2003; Kim and Reaven, 2013; Moran et al., 2008; Willeit et al., 1997), suggesting sex-dependent  
76 modulations in whole body metabolism. Recent studies suggest a role of the gut microbiota in  
77 the differences between sexes in the regulation of lipid metabolism (Baars et al., 2018).  
78 Nevertheless, complete understanding of mechanistic basis behind sexual dimorphism in  
79 metabolic syndrome is still lacking.

80  
81 Previous studies have uncovered an association between a history of helminth infection and  
82 reduced prevalence of metabolic disease in humans and rodents ((Doenhoff et al., 2002; Stanley  
83 et al., 2009; Wiria et al., 2015). Specifically, infection by Schistosomes reduces cholesterol and  
84 atherosclerotic plaques (Doenhoff et al., 2002; Stanley et al., 2009), this effect has been  
85 attributed, in part, to an anti-inflammatory phenotype in macrophages (Wolfs et al., 2014) and  
86 transcriptional reprogramming of phospholipid and glucose metabolism related genes in hepatic  
87 macrophages (Cortes-Selva et al., 2018). Moreover, it has been postulated that schistosomes  
88 have the potential to affect long term glucose metabolism in T cells (Chen et al., 2013).  
89 Accumulating evidence suggests that biological sex affects disease progression; yet the effect of  
90 schistosomiasis on metabolic-protection in females and males it is not well understood, as most

91 studies have been conducted only in males or no sex differentiation has been made during data  
92 analysis ((Sanya et al., 2019; Shen et al., 2015; Wolde et al., 2019)). To date, no report with a  
93 particular emphasis on females has been conducted.

94  
95 Schistosomiasis induces Th2 polarization and alternative activation of macrophages, essential for  
96 host survival (Barron and Wynn, 2011; Fairfax et al., 2012; Herbert et al., 2004). IL-4 induced  
97 alternative activation of macrophages relies on oxidative phosphorylation (OXPHOS) and fatty  
98 acid oxidation for energy production, and is dependent on cell intrinsic lysosomal lipolysis  
99 (Huang et al., 2014; Vats et al., 2006). Macrophage metabolism follows a dysmorphic pattern, as  
100 sex-related differences affect the processes involved in cholesterol and lipid metabolism in  
101 macrophages as well as inflammatory cytokine production in adipose tissue (Griffin et al., 2016;  
102 Ng et al., 2001). Moreover, in rats, phagocytes from females had increased ROS generation than  
103 males (Rudyk et al., 2018). Such differences have often been attributed to the role of sex  
104 hormones in gene expression and immune cell function (Rubinow, 2018; Taneja, 2018; Winn et  
105 al., 2019), but a clear understanding of the effects of sex on the regulation of macrophage  
106 metabolism, as well as how sex modulates the effects of schistosomiasis in the protection from  
107 metabolic disease is lacking.

108  
109 In the present study, we sought to determine the systemic effects of *S. mansoni* infection on the  
110 myeloid lineage. Surprisingly, we discovered that macrophages derived from the bone marrow of  
111 *S. mansoni* infected male mice have dramatically increased oxygen consumption and  
112 mitochondrial mass compared to those from uninfected males. This shift is accompanied by  
113 increased carbon shuttling into TCA cycle intermediates, a decrease in cholesterol esters, and

114 increased fatty acid oxidation. When we examined the role of biological sex in schistosome  
115 induced modulation we found that *S. mansoni* infection does not reliably protect ApoE<sup>-/-</sup> female  
116 mice from HFD induced weight gain or glucose intolerance. The sex-dependent effect of  
117 infection extends to the myeloid lineage, where bone marrow derived macrophages from infected  
118 females display the opposite metabolic phenotype as those from infected males, with a dramatic  
119 increase in cellular cholesterol esters. Overall, these data present the first evidence that *S.*  
120 *mansoni* systemically modulates the myeloid compartment in a sex-dependent manner and  
121 provide a more comprehensive understanding of how *S. mansoni* infection may confer metabolic  
122 protection at the cellular level.

123

## 124 **Results**

### 125 **Macrophages derived from *S. mansoni* infected male mice have increased oxygen** 126 **consumption and spare respiratory capacity**

127

128 We have previously reported that schistosomiasis alters the expression of numerous genes  
129 relevant to glucose, cholesterol, and amino acid metabolism in hepatic macrophages of male  
130 mice (Cortes-Selva et al., 2018). These alterations are associated with improved insulin  
131 sensitivity and atherosclerotic score in male mice. Since it has previously been shown that  
132 during *S. mansoni* infection the majority of liver macrophages are monocyte derived, and  
133 monocyte recruitment drives both atherosclerosis (Potteaux et al., 2011; Tacke et al., 2007) and  
134 obesity induced insulin resistance (Beliard et al., 2017; Liang et al., 2007; Oh et al., 2012; Rull et  
135 al., 2010), we hypothesized that Schistosome infection may imprint the monocyte- macrophage  
136 lineage with altered metabolic propensities. To elucidate whether infection imprints

137 macrophages with an altered metabolic phenotype we infected (and mock infected controls)  
138 atherogenesis-prone male ApoE<sup>-/-</sup> mice on high-fat diet (HFD), and sacrificed them at 10-weeks  
139 post-infection to harvest bone marrow cells. Macrophages were differentiated *in vitro* with M-  
140 CSF in a 6-7-day culture. We performed real-time extracellular flux analysis on unstimulated  
141 bone marrow derived macrophages (BMDM) from ApoE<sup>-/-</sup> HFD infected and uninfected  
142 (control) HFD mice to quantify oxygen consumption rate (OCR) (Figure 1A). BMDM from  
143 ApoE<sup>-/-</sup> HFD infected mice showed improved basal respiration (Figure 1B) and significantly  
144 increased spare respiratory capacity (p<0.0001, Figure 1C). Since eukaryotic cells integrate  
145 oxidative phosphorylation (OXPHOS), glycolysis and the tricarboxylic acid (TCA) cycle to  
146 satisfy energy requirements, we also tested the extracellular acidification rate (ECAR), which is  
147 suggested as a marker of inhibited mitochondrial respiration (Pike Winer and Wu, 2014), in  
148 BMDM from infected and uninfected ApoE<sup>-/-</sup> HFD mice. We observed no differences in ECAR  
149 in infected male mice compared to uninfected controls (Figure 1D). Cell intrinsic lysosomal  
150 lipolysis has previously been shown to support macrophage spare respiratory capacity in the  
151 context of macrophage alternative activation (Huang et al., 2014; Liu et al., 2017). We stained  
152 for hydrophobic and neutral lipids by Oil Red O (ORO) (Mehlem et al., 2013) and observed that  
153 the lipid content of BMDM from infected ApoE<sup>-/-</sup> males trended to reduction in comparison to  
154 the control group, but was not significantly reduced (Figure 1E). To analyze BMDM  
155 mitochondrial mass, which has also been linked to increased respiratory capacity (Langston et  
156 al., 2017), we analyzed mitochondrial activity by Mitotracker Deep Red FM. We observed that  
157 BMDM from infected mice exhibited increased MitoTracker median fluorescent intensity (MFI)  
158 in comparison to the BMDM from uninfected mice (Figure 1F). Overall, these data indicate that  
159 *S. mansoni* infection in males leads to increased oxygen consumption and mitochondrial

160 metabolism in BMDM. Mitochondrial oxidative dysfunction in macrophages has recently been  
161 linked to insulin resistance (Jung et al., 2018), so this metabolic shift could contribute to the  
162 infection-induced improvement in glucose tolerance seen in infected males .

163

164 **Schistosomiasis in male ApoE<sup>-/-</sup> mice alters metabolic flux of glucose and the lipidomic**  
165 **fingerprint of macrophages**

166

167 In order to understand how Schistosome infection alters the metabolic fingerprint and promotes  
168 mitochondrial metabolism in macrophages derived from ApoE<sup>-/-</sup> HFD male mice, we performed  
169 metabolic tracing analysis, where macrophages were differentiated in the presence of normal  
170 glucose and then switched to <sup>13</sup>C-labeled glucose for 24 hours. We observed increased shuttling  
171 of heavy labeled glucose to malate (Figure 2A), citrate (Figure 2B), itaconate (Figure 2C), and  
172 succinate Figure 2E in BMDM from infected mice in comparison to BMDM from uninfected  
173 mice. The lack of increased heavy lactate production (Figure 2D), suggests that the primary  
174 reprogramming is focused on glucose-dependent mitochondrial metabolism. Importantly, we  
175 found no upregulation of alternative activation markers (CD301, CD206, Arg1, Nos2) in  
176 unstimulated BMDM from infected mice when compared to BMDM from controls  
177 (Supplementary Figure 1). Since we have previously shown that infection alters the phospholipid  
178 and cholesterol metabolism in hepatic macrophages (Cortes-Selva et al., 2018), we performed  
179 unbiased lipidomics using liquid chromatography-mass spectrometry (LC-MS). We used a  
180 supervised model by partial least squares-discriminant analysis (PLS-DA), with two components  
181 to determine the lipidomic profile of BMDM. There was a robust separation between groups that  
182 indicates the metabolic profiles of BMDM from infected and uninfected males differ

183 significantly and suggests that there is a prominent alteration of metabolites induced by infection  
184 in male mice (Figure 2F). The lipid species that drive the variation observed in the PLS-DA as  
185 measured by the Variable Importance in Projection (VIP) score from uninfected males in  
186 comparison to infected males included cholesterol esters (CE) (20:1), CE (22:0), CE (24:0), CE  
187 (24:1), CE (22:4), CE (22:1), CE (18:0); diacylglycerols (DG) (16:0\_16:0), DG (16:0\_18:0) and  
188 triacylglycerol (TG) (16:0\_16:0\_16:0) (Figure 2G,H). We then analyzed the total CE levels in  
189 macrophages from both groups of male mice and found that infection led to significantly reduced  
190 CE in male mice ( $p < 0.0001$ , Figure 2I), further evidencing an important role of cholesterol  
191 metabolism in macrophages following helminth infection. Next, we determined the  
192 transcriptomic modifications induced by infection in unstimulated BMDM from infected and  
193 uninfected males by mRNA sequencing (mRNAseq). Significant gene expression differences  
194 were observed in BMDM from infected male mice, compared to uninfected controls. Transcripts  
195 from the two groups are depicted in Volcano plots, using false discovery rate ( $FDR < 0.05$  in red,  
196  $FDR < 0.01$  in blue) and Log<sub>2</sub> fold changes (cut off of .6 Log<sub>2</sub> FC) to identify statistically  
197 significant genes (Figure 2J). Among the differentially regulated factors are Gbp6, which is  
198 related to interferon- $\gamma$  signaling and innate immune function; Gm7609, a predicted pseudogene;  
199 Gbp4, a member of the GTPase family involved in protective immunity against microbial and  
200 viral pathogens; Apol9a, which is predicted to be related to lipid transport, lipoprotein metabolic  
201 processes and stimulated by interferon; Iigp1, a GTPase with roles in response to intracellular  
202 pathogens; CD300e, which belongs to families of paired activating and inhibitory receptors  
203 implicated in immune responses; and Batf2, a basic leucine zipper factor whose activation is  
204 detrimental for type-1 infectious disease. Importantly, Mgl1, which encodes monoacylglycerol  
205 lipase that catalyzes the conversion of monoacylglycerides to free fatty acids and glycerol was



206 significantly increased. Mgl1 is required for lipolysis and improved glucose homeostasis in mice  
207 on HFD (Berdan et al., 2016; Douglass et al., 2015), an infection driven increase was validated  
208 by RT-qPCR (Figure 2L). In addition, Slc1a3, which encodes for the glutamate aspartate  
209 transporter 1 that is localized in the inner mitochondria membrane as part of the malate-aspartate  
210 shuttle and is relevant for amino acid homeostasis in adipocytes, was significantly altered in our  
211 model, and was further validated by RT-qPCR (Figure 2M). Interestingly, the pathways  
212 significantly altered (Figure 2K) during infection included hematopoietic cell lineage ( $p=5.779$   
213  $\times 10^{-8}$ ), asthma ( $p=3.169 \times 10^{-5}$ ), and cytokine-cytokine receptor interactions, graft-versus host  
214 disease, type 1 diabetes and allograft regression ( $p=0.0000894$ ). Together, these data identify key  
215 factors in immune and metabolic responses as well as novel factors with unknown functions that  
216 are regulated by exposure to *S. mansoni* infection.

217

218 ***S. mansoni* infection protects male mice, but not female mice, from obesity and glucose**  
219 **intolerance independently of systemic alternative macrophage activation**

220

221 Sex is a key contributor to the phenotype of cardiovascular and metabolic features in mammals  
222 (Chella Krishnan et al., 2018), so we assessed the sex dependent impact of *S. mansoni* infection  
223 on obesity and glucose intolerance. For this, we fed male and female ApoE<sup>-/-</sup> HFD for 10-days  
224 before infection. We infected and mock infected mice (controls) as described in the methods.  
225 Ten weeks post infection we analyzed body weight and glucose tolerance (via an IP glucose  
226 tolerance test) and found that infection is significantly beneficial for male, but not female mice,  
227 as only males are protected from HFD-induced weight gain and glucose intolerance (Figure 3A,  
228 3B). We also analyzed serum triglyceride (TG) and diglyceride (DG) levels using untargeted

229 lipidomics and found that relative abundance of both TG and DG were decreased in infected  
230 males as compared to uninfected males, while TGs were increased by infection in females and  
231 DGs were unchanged (Figure 3C). These data indicate that *S. mansoni* infection induces a sex-  
232 dependent modulation of metabolic disease parameters. We then wondered if this infection-  
233 mediated effect in males only was correlated with differences in systemic alternative activation  
234 of hepatic macrophages in females. Flow cytometry analysis showed that alternative activation  
235 markers (CD206, CD301, Arg1) were highly expressed in macrophages from male and female  
236 mice following infection, but not in naïve mice (Figure 3D), suggesting that *S. mansoni* induced  
237 alternative activation irrespective of sex. Previous studies characterizing the dynamics of  
238 alternatively activated macrophages during schistosome infection have found that these  
239 macrophages primarily arise from Ly6C<sup>high</sup> monocytes (Girgis et al., 2014; Nascimento et al.,  
240 2014). Naïve male and female ApoE<sup>-/-</sup> mice on HFD had equivalent frequencies of Ly6C<sup>high</sup>  
241 monocytes circulating in peripheral blood. At 10-weeks post infection we found an increased  
242 percentage of both Ly6C<sup>int</sup> and Ly6C<sup>high</sup> cells (Figure 3E) in both male and female mice  
243 compared to the mock infected controls, with the frequency of Ly6C<sup>high</sup> cells in females 1.74  
244 times that of males, suggesting either increased monopoiesis in females, or increased tissue  
245 recruitment in males. Since we had found increased mitochondrial MFI in BMDM from infected  
246 male mice, we asked whether circulating blood monocytes are similarly modulated. We observed  
247 an infection induced increase in Mitotracker fluorescent intensity in monocytes from male ApoE<sup>-/-</sup>  
248 mice on HFD, but not from females (Figure 3F). These data suggest that there is sex-specific  
249 increased mitochondrial activity following infection in the monocyte cell population. We then  
250 wondered if these effects in the differentiated monocytes are the result of long-lasting changes in  
251 the myeloid lineage after helminth infection. For this, we analyzed the main lineages of

252 hematopoietic progenitors that produce myeloid cells: granulocyte-monocyte progenitors (GMP),  
253 monocyte-DC progenitors (MDP) and the common myeloid progenitor (CMP) in female and  
254 male ApoE<sup>-/-</sup> mice. CMP were defined as Lin<sup>-</sup>CD127<sup>-</sup>c-Kit<sup>+</sup>Sca-1<sup>-</sup>CD34<sup>+</sup>FcRII/III<sup>lo/-</sup> (Paul et al.,  
255 2016), GMP were defined as Lin<sup>-</sup>IL-7R<sup>-</sup>Sca-1<sup>-</sup>c-kit<sup>+</sup>CD34<sup>+</sup>FcR II/III<sup>+</sup>, and MDP were defined  
256 as defined as Lin<sup>-</sup>c-Kit<sup>+</sup>Sca-1<sup>-</sup>CD34<sup>+</sup>FcγR<sup>lo</sup>CD115<sup>hi</sup> cells. Overall bone marrow cellularity  
257 was not affected by Schistosome infection (Figure 3G), however, the numbers of CMP and GMP  
258 in infected male mice were significantly reduced compared to uninfected controls, while GMP  
259 and CMP were not reduced in females (Figure 3 H-J). The numbers and percentages of MDP  
260 remained unchanged in infected females and males compared to uninfected controls (Figure 3K,  
261 3L). These data suggest that *S. mansoni* infection modulates both metabolic disease and the  
262 myeloid lineage in a sex-specific manner that is independent from the induction of systemic  
263 alternative activation.

264

### 265 ***S. mansoni*-increases fatty acid oxidation in male but not female ApoE<sup>-/-</sup> mice on HFD**

266

267 In order to determine whether infection-induced pathologic differences in males and females  
268 were accompanied by sex-specific differential macrophage metabolic regulation, we cultured  
269 bone marrow cells from 10-week infected or uninfected control male and female mice for 7 days  
270 to generate BMDM. OCR was measured in real time in basal conditions and following the  
271 addition of mitochondrial inhibitors in unstimulated BMDM from both infected and uninfected  
272 male and female ApoE<sup>-/-</sup> animals. Similar to as seen in Figure 1A, BMDM from infected males  
273 exhibited increased basal OCR and spare respiratory capacity compared to uninfected male  
274 controls (Figure 4A, 4B, 4C). However, basal OCR and spare respiratory capacity of BMDM

275 from infected females remained unaltered in comparison to BMDM from uninfected females  
276 (Figure 4A, 4B, 4C). Moreover, side by side OCR analysis in females and males with palmitate  
277 as a substrate (glucose limiting conditions) showed that BMDM from infected male, but not from  
278 infected females had an increased ability to oxidize exogenous palmitate (Figure 4D). In  
279 addition, BMDM from infected males but not females had significantly increased palmitate basal  
280 OCR and palmitate spare respiratory capacity, suggesting exogenous free fatty usage as a carbon  
281 source for OXPHOS (Figure 4E, 4F). Similar to the male only data, we observed no differences  
282 in macrophage lipid content in either group, suggesting that global lipolysis may not underlie  
283 OCR and spare respiratory capacity in our model (Figure 4G). Additionally, analysis of  
284 mitochondrial mass in females and males showed that similar to blood monocytes, BMDM from  
285 infected male mice, but not females have a significantly higher Mitotracker MFI. These data  
286 suggest that *S. mansoni* infection improved mitochondrial biogenesis in males, but not females.  
287 Again, suggesting differential regulation of macrophage metabolism based on biological sex.  
288 This regulation may account in part for the differences in the role of infection in modulating  
289 obesity and insulin sensitivity.

290

### 291 ***S. mansoni* infection differentially alters the cellular lipid profile in female and male mice**

292

293 To understand the sex specific modulations induced by schistosomiasis in macrophage lipid  
294 metabolism, we isolated cellular lipids from unstimulated BMDM and performed unbiased  
295 lipidomics in male and female derived-cells. PLS-DA showed that *S. mansoni* infection led to a  
296 sex-specific lipid profile (Figure 5A). Further, analysis of total CE (identified as a VIP species in  
297 males in Figure 2) showed that infection led to decreased levels of CE in cells derived from

298 infected male mice. In contrast, infection led to significantly increased total CE in BMDM  
299 derived from infected female mice (Figure 5B). Similar to males, infection in females induces a  
300 unique lipid signature (Figure 5C), with two species of plasmanyl-PE, three species of  
301 plasmanyl-PC, BMP and CE as the main drivers of the altered lipid profile in females during  
302 infection (Figure 5D). Since we observed BMP's as a VIP compound driven by *S. mansoni*  
303 infection in females, but not males, we went back and performed targeted lipidomics to quantify  
304 BMPs at the class level. Indeed, total BMPs were significantly increased by infection in BMDM  
305 from females but not males (Figure 5E). Our Seahorse data indicates that *S. mansoni* infection  
306 induced differential oxidation of exogenous palmitate in BMDM derived from males and  
307 females. In order to understand the metabolic flux of exogenous palmitate, we performed  
308 metabolic tracing analysis of palmitate, where macrophages were differentiated in the presence  
309 of normal glucose and then switched to C<sup>13</sup>-labeled palmitate for 24 hours. Similar to what we  
310 documented with glucose, we observed increased shuttling of heavy labeled palmitate into  
311 succinate, malate, and fumarate in BMDM derived from infected males, with decreased shuttling  
312 into myristate (a marker of fatty acid elongation). BMDM derived from infected females  
313 displayed the opposite phenotype, with decreased shuttling of heavy labeled palmitate into  
314 succinate, malate, and fumarate, and increased shuttling into myristate compared to BMDM from  
315 uninfected controls. These data suggest that BMDM derived from infected male ApoE<sup>-/-</sup> mice  
316 have increased basal utilization of exogenous palmitate for beta-oxidation, while the female data  
317 suggests increased lipid synthesis, strengthening the data obtained from our palmitate  
318 extracellular flux analysis.

319 To further understand the role of biological sex in the *S. mansoni* induced reprogramming of the  
320 BMDM lipidome, we isolated cellular lipids from male and female BMDM either unstimulated

321 (media), or following LPS stimulation, and then performed untargeted lipidomics as described in  
322 Figure 5. We analyzed the lipidomic data with machine learning using a two-step selection  
323 process (see Methods). This approach identified ~20 features (lipid compounds) contributing to  
324 an elastic net regression model that can predict the infection status of samples-originating  
325 animals (Zou, 2005). These informative features are listed in descending order of importance  
326 (Supplemental Figure 2A). Interestingly, some key features (for instance, the top scoring one) are  
327 not represented as significant in the univariate tests (univariate adjusted p values, Supplemental  
328 Figure 2B). However, these features are important contributors to the multivariate machine  
329 learning model. This is not unexpected – some features that would be considered uninformative  
330 individually may be very useful in improving predictions if combined with other features. When  
331 we examine these features individually, we can see a differential response to infection for males  
332 and females (for instance, PG 18:1\_18:2, a glycerophospholipid) represented in Supplemental  
333 Figure 2C). Seven of the 20 molecular features identified by machine learning are BMP  
334 (Bis(monoacylglycerol)phosphate) species, which have been implicated in glycosphingolipid  
335 degradation and cholesterol transport (Anheuser et al., 2019; Luquain-Costaz et al., 2013). These  
336 data further support the hypothesis that *S. mansoni* infection differentially modulates the  
337 metabolism of myeloid cells from male and female animals, and that this modulation revolves  
338 around decreased cholesterol storage and fatty acid synthesis in males and increased cholesterol  
339 storage and fatty acid synthesis in females. Cholesterol and lipid metabolism has previously been  
340 associated with inflammatory myeloid effector function (Carroll et al., 2018; Funk et al., 1993;  
341 Oiknine and Aviram, 1992), so we quantified the acute inflammatory effectors nitrite and iNOS,  
342 along with pro-inflammatory cytokines/chemokines IL-12p70, CXCL1, and IL-6  
343 (chemokines/cytokines with known pathogenic roles in obesity, insulin resistance and

344 atherosclerosis) following stimulation with LPS. *S. mansoni* infection increases LPS induced  
345 nitrite and iNOS production in BMDM from male, but not female ApoE<sup>-/-</sup> mice on HFD (Figure  
346 5 J,K). Conversely, BMDM from infected males have decreased production of IL-2p70, CXCL1,  
347 and IL-6 (Figure 5 L-N) following LPS stimulation as compared to BMDM from uninfected  
348 controls. LPS induced IL-12p70, CXCL1, and IL-6 production by female BMDM is unaffected  
349 by infection status. Increased production of the effector molecules nitrite and iNOS combined  
350 with decreased production of pro-inflammatory mediators associated with chronic inflammation  
351 supports the idea that *S. mansoni* infection promotes a hybrid macrophage state in males.

352

### 353 ***S. mansoni* infection modulates the myeloid transcriptome in a sex-specific manner**

354 Since we documented significant sex dependent shifts in functional metabolism in BMDM from  
355 male and female *S. mansoni* infected mice, we sought to determine if differential transcriptional  
356 modulation underlies these shifts. In order to investigate the genes and respective pathways that  
357 were associated with specific conditions and the ones that were differentially regulated by sex we  
358 performed mRNAseq on unstimulated BMDM derived from male and female ApoE<sup>-/-</sup> mice at 10-  
359 weeks post *S. mansoni* or mock infection. We identified different subsets of genes that were  
360 preferentially upregulated in males (p<0.05, Figure 6A). Among 1448 genes upregulated in  
361 males regardless of infection status with a p value <0.05, the majority of these (238 genes) were  
362 associated to metabolic functions by pathway analysis. Of these 238 genes involved in  
363 metabolism we identified hexokinase 1 (hk1), citrate synthase (cs), apolipoprotein A2 (apoa2),  
364 aldehyde dehydrogenase 3 family member A2 (aldh3a2), lipoyltransferase (lipt1), solute carrier  
365 family 19 member 1 (slc19a1), LDL receptor related protein 1 (lrp1), many of these are involved  
366 in lipoprotein and cholesterol metabolism. These data suggest that myeloid metabolism is

367 differentially regulated by sex, at least in the context of HFD. In addition, we found 216 genes  
368 involved in immunity. Among these genes with immune function we identified interleukin 10 (il-  
369 10), Toll like receptor 5 (tlr5), NLR family pyrin domain containing 3 (nlrp3), inducible T cell  
370 costimulatory (icos), which have diverse pro and anti-inflammatory function in the immune  
371 system. Next, we surveyed the genes that are differentially regulated in males and females  
372 following *S. mansoni* infection. We found 66 genes involved in metabolism, hemostasis, the  
373 adaptive immune system, collagen degradation and not annotated to specific pathways.  
374 Following the genes with known function, the majority (10) of differentially regulated genes  
375 have documented roles in metabolism. Among these, we identified type II iodothyronine  
376 deiodinase (dio2), which has been implicated in the regulation of diet induced obesity  
377 (Kurylowicz et al., 2015; Vernia et al., 2013). Moreover, we found that hexokinase 3 (hk3), fatty  
378 acid binding protein 4 (fabp4), sphingomyelin synthase 2 (sgms2), solute carrier family 6  
379 member 8 (slc6a8) were all upregulated in male and downregulated in female BMDM following  
380 *S. mansoni* infection (Figure 6B). In addition, we performed gene ontology analysis from the 66  
381 genes that were differentially regulated in females and males. The most significant pathways  
382 were response to glucocorticoids, glycoprotein metabolism, and fatty acid metabolism, again  
383 suggesting that there is a sex-specific metabolic response to *S. mansoni* infection in myeloid  
384 cells. These pathways may help explain the differential metabolic modulation induced by  
385 schistosomiasis in males and females (Figure 6C).

386

387 ***S. mansoni* induced modulation of male macrophage metabolism is long-lived in the**  
388 **absence of antigen**



389 Our metabolic and transcriptomic data from BMDM differentiated *in vitro* from male *S. mansoni*  
390 infected mice suggested that metabolic modulation may be long-lived in the absence of ongoing  
391 antigen exposure. In order to determine durable nature of modulation we transferred bone  
392 marrow from either 10-week *S. mansoni* infected male ApoE<sup>-/-</sup> mice on HFD, or uninfected male  
393 controls into busulfan treated recipient ApoE<sup>-/-</sup> mice on HFD. At 10 weeks post-bone marrow  
394 transfer we assayed glucose tolerance via an i.p. GTT. Mice that received bone marrow from  
395 infected males have a significantly lower glucose area under the curve (AUC) than those that  
396 received control bone marrow. We harvested bone marrow from all recipients and differentiated  
397 BMDM in M-CSF for 6 days and then performed real-time extracellular flux analysis. BMDM  
398 from recipients of bone marrow from *S. mansoni* infected mice had significantly higher basal  
399 oxygen consumption and a trend towards increased spare respiratory capacity as compared to  
400 BMDM generated from recipients of uninfected control bone marrow. Additionally, BMDM  
401 from recipients of bone marrow from *S. mansoni* infected mice had a significantly higher  
402 Mitotracker MFI than BMDM from recipients of control bone marrow. These data suggest that *S.*  
403 *mansoni* induced metabolic modulation of the myeloid lineage in males is long-lived even in the  
404 absence of ongoing exposure to egg antigens, and that hematopoietic cells are at least partially  
405 responsible for the regulation of whole-body glucose metabolism in the HFD ApoE<sup>-/-</sup> model.

## 406 **Discussion**

407 Helminth infections in general, and schistosomiasis in specific, have been known to be  
408 inversely correlated with obesity and glucose intolerance for over a decade, a phenomenon  
409 thought to be associated with Type 2 polarization of macrophages and T cells. In the current  
410 study we report that *S. mansoni* infection induces dramatic metabolic alterations in BMDM from  
411 male ApoE<sup>-/-</sup> mice on HFD. Our results indicate that macrophages derived from the bone marrow

412 of infected male mice have increased basal oxygen consumption and spare respiratory capacity  
413 compared to those derived from uninfected males. In T cells, an increase in spare respiratory  
414 capacity has been linked to mitochondrial biogenesis, and controls the transition to a long-lived  
415 memory phenotype (van der Windt et al., 2012). In macrophages, M2 (alternative) activation has  
416 previously been shown to lead to increased spare respiratory capacity, a process that also  
417 involves mitochondrial biogenesis (Kannan et al., 2016), while TLR recognition of bacteria has  
418 been shown to increase mitochondrial respiration via modulation of complex I and II (Garaude et  
419 al., 2016) . In both cell types, the increased mitochondrial respiration underlies the longevity of  
420 the cells. In our model we have not found most of the traditional markers used to define M2  
421 alternative activation by flow cytometry at steady state (Supplemental Figure 1). Arg1 is the only  
422 canonical M2 transcript that is modulated in the BMDM from infected male mice at steady state,  
423 and that fold increase is relatively low (.894 log FC, adjusted  $p$ -value = .035). Arg1 drives the  
424 production of polyamines, which in turn are able to modulate mitochondrial OxPHOS (Galvan-  
425 Pena and O'Neill, 2014; Puleston et al., 2019). In the currently accepted paradigm of M2  
426 polarization stat6 phosphorylation upregulates PGC1- $\beta$  and PPAR $\gamma$ , leading to mitochondrial  
427 biogenesis and increased beta-oxidation in addition to Arg1 transcription. Here we present a  
428 model where neither PGC1- $\beta$  or PPAR $\gamma$  are modulated, but Arg1 transcription is increased with  
429 a concomitant dramatic increase in mitochondrial respiration, suggesting that there may be  
430 alternative ways to modulate mitochondrial metabolism.

431         Alternative activation has previously been shown to be dependent on cell intrinsic  
432 lysosomal lipolysis and lal, with the defining feature being reductions in lipid droplets (Huang et  
433 al., 2014). In our model using unstimulated BMDM from *S. mansoni* infected mice there is no  
434 gross difference in lipid droplets, nor an increase in lal transcripts. Instead, we found a

435 significant shift in the lipidome of BMDM from infected male mice that centered on a reduction  
436 in cholesterol esters. Previously published work in IL-4 induced M2 macrophages has found that  
437 lipolysis centered on TGs as a fatty acid source. While we did find reductions in two species of  
438 DGs and one species of monoacylglycerol (MG), there were no significant alterations to TAGs  
439 in the BMDM generated from infected males. Flux analysis with heavy carbon labeled glucose  
440 and palmitate suggest that BMDM from male infected mice have increased shuttling of both  
441 glucose and palmitate into TCA cycle intermediates, suggesting that these cells have increased  
442 mitochondrial beta oxidation. In addition to the unique lipidomic modulations, we found that the  
443 dramatic increase in both basal oxygen consumption and spare respiratory capacity we observed  
444 in BMDM from male infected mice was significantly palmitate dependent. This observation  
445 further supports the idea that *in vivo* exposure of myeloid precursors to helminth antigens  
446 induces unique metabolic modulations that focus on cholesterol and lipid metabolism as a source  
447 for palmitate for beta oxidation. These data suggest that hybrid metabolic states in the absence of  
448 M1 or M2 polarization occur in macrophages in the context of chronic disease, and present a  
449 challenge to the dichotomy of M1 versus M2 activation being driven by immunometabolism.  
450 Future studies exploring the immunometabolism of bone marrow derived and tissue resident  
451 macrophages and dendritic cells from other chronic infections and inflammatory diseases are  
452 needed in order to obtain a true picture of the correlation between metabolism and myeloid  
453 polarization.

454         There are significant clinical differences in both the etiology and pathology of diabetes  
455 and cardiovascular disease between males and females, but sex differences in immunological  
456 activation or modulation by *S. mansoni* infection have not previously been studied in humans or  
457 animal models. Surprisingly, we found that the unique metabolic modulations induced by *S.*

458 *mansoni* infection in BMDM from male mice do not occur in females, and infected females are  
459 not reliably protected from high-fat diet induced obesity or glucose intolerance. Interestingly,  
460 hepatic macrophage alternative activation in response to infection is equivalent between males  
461 and females, but infection increases blood monocyte frequency in females to a much greater  
462 extent than in males, suggesting sex specific modulation of either monopoiesis or monocyte  
463 recruitment into tissues. Blood monocytes from infected males phenocopy the increase in  
464 Mitotracker MFI that we have found in BMDM generated from infected males, indicating that  
465 our BMDM model is likely an accurate representation of the *in vivo* potential of the myeloid  
466 compartment. Interestingly, we found that infection significantly reduced the total number of  
467 CMP and GMP in male, but not female bone marrow, again pointing to a sex-specific  
468 modulation of the myeloid lineage at the precursor level. The reduction of CMP and GMP in  
469 infected males suggests either an increase in the rate of differentiation into  
470 monocytes/granulocytes, or decreased homeostatic proliferation. Since males have fewer blood  
471 monocytes than female, we favor the later possibility. These possibilities and the relationship  
472 between reductions in numbers of CMP and GMP in males, and the functional metabolic  
473 differences in BMDM will be explored in future work.

474  
475         Analysis of the BMDM transcriptomes from males and females revealed that over a  
476 thousand genes are up regulated in male versus female BMDM regardless of *S. mansoni*  
477 infection state. At the same time, over five dozen are differentially regulated by infection.  
478 Focusing on the genes that are up-regulated in BMDM from infected males and down-regulated  
479 in females, we found more than ten genes with known functions in cellular metabolism. Some of  
480 these genes, like PFKFB3, have known regulatory elements for progesterone and estrogen (Shi et

481 al., 2017), but some of them, like *fabp4*, have no published mechanism of sex hormone  
482 regulation. Glycolysis and cholesterol metabolism have previously been shown to directly affect  
483 the inflammatory potential of myeloid cells. Our data indicate that *S. mansoni* infection induces a  
484 hybrid inflammatory state in male but not female BMDM, where the LPS induced production of  
485 nitrite and iNOS is enhanced, while the production of the key chronic pro-inflammatory  
486 mediators IL-12p70, CXCL1, and IL-6 are reduced. This inflammatory profile is distinct from  
487 what has previously been published with IL-4 induced M2 macrophages, where the production of  
488 iNOS and nitrite are reduced following TLR stimulation (Lam et al., 2016). CXCL1 and IL-6  
489 have previously been linked to increased monocyte recruitment and disease progression in both  
490 atherosclerosis and obesity-induced diabetes (Boisvert et al., 2006; Hartman and Frishman, 2014;  
491 Nunemaker et al., 2014; Qu et al., 2014; Zhou et al., 2011), so these data support the possibility  
492 of infection driven modulation of macrophage function supporting the decreased pathology seen  
493 in infected males. We have demonstrated that the modulation of macrophage oxygen  
494 consumption is transferrable to an uninfected recipient, and can last for at least ten weeks,  
495 suggesting that in males, *S. mansoni* infection induces long-lived metabolic modulation of the  
496 myeloid lineage that survives in the absence of ongoing antigenic exposure. Trained innate  
497 immunity has previously been documented to be induced by BCG immunization (Kaufmann et  
498 al., 2018), and has recently been suggested to be the mechanism underlying the association  
499 between previous bacterial and fungal infections and the development of atherosclerosis  
500 (Hoogeveen et al., 2018; Leentjens et al., 2018). In these models, trained immunity and  
501 epigenetic reprogramming is driven in part from a switch from oxidative phosphorylation to  
502 increased aerobic glycolysis (Cheng et al., 2014; Stienstra et al., 2017). In the case of BCG,  
503 trained circulating monocytes can be found months after immunization, which strongly suggests

504 reprogramming of bone marrow progenitors (Ifrim et al., 2014). Recent reports indicate that  
505 western high-fat diet itself also induces innate training of bone marrow progenitors in both the  
506 *Ldr<sup>-/-</sup>* model of atherosclerosis (Christ et al., 2018) and in obesity related steatohepatitis (Krenkel  
507 et al., 2020). Our data suggests that *S. mansoni* infection in males trains the myeloid lineage in  
508 the opposite fashion; modulating the metabolic transcriptome of the myeloid lineage such that  
509 oxidative phosphorylation and mitochondrial activity is increased, while the chronic  
510 inflammatory potential is decreased. Alterations to the numbers and frequency of myeloid  
511 progenitors and the transferability of our phenotype via bone marrow suggests that progenitors  
512 are indeed modulated in our model, the relative role of epigenetic modulation versus microRNA  
513 regulation in dictating the *S. mansoni* induced myeloid transcriptome will be the subject of future  
514 studies.

515       There are significant differences in both the susceptibility and disease presentation  
516 between males and females for both diabetes and cardiovascular disease, but few studies have  
517 focused on the role of immunometabolism in this dichotomy. Our data suggests apparent  
518 biological sex-dependent differences in both the ability of schistosomes to protect from the  
519 development of HFD induced metabolic disease parameters, and the ability to modulate  
520 macrophage glucose and lipid metabolism. The current epidemiological data strongly indicates  
521 an inverse correlation between helminth infections and metabolic diseases such as diabetes and  
522 cardiovascular disease, but these studies were not designed to identify sex-specific correlations.  
523 Few animal studies have focused on the role of myeloid cells in driving sex-specific metabolic  
524 differences. Our current data indicate a clear need for further studies in both humans and animal  
525 models to specifically probe the relationship between biological sex and myeloid metabolism,  
526 and how chronic helminth infections modulate this.

527

## 528 **Conflict of Interest**

529 The authors declare no competing interests.

## 530 **Acknowledgements**

531 The work was supported by The University of Utah, a Scientist Development Grant from the  
532 American Heart Association to KCF (14SDG18230012), an American Heart Association Pre-  
533 doctoral Award (18PRE34030086) to DCS, and 1R21AI135385-01A1 to EA. *B. glabrata* snails  
534 provided by the NIAID Schistosomiasis Resource Center of the Biomedical Research Institute  
535 (Rockville, MD) through NIH-NIAID Contract HHSN272201700014I for distribution through  
536 BEI Resources. JEC is supported through U54 DK110858-01, mass spectrometry equipment  
537 employed was provided by 1S10OD016232-01, 1S10OD018210-01A1 and 1S10OD021505-01  
538 to JEC.

539

## 540 **STAR Methods**

## 541 **KEY RESOURCES TABLE**

| REAGENT or RESOURCE                                       | SOURCE         | IDENTIFIER             |
|-----------------------------------------------------------|----------------|------------------------|
| Antibodies                                                |                |                        |
| Anti-mouse F4/80 (Clone: BM8)                             | Biolegend      | Cat no. 123114         |
| Anti-mouse CD64 a and b Alloantigens (Clone: X54-5/7.1.1) | BD Biosciences | Cat no. 558455         |
| Biotinylated Goat Anti-m-Mer                              | R&D Systems    | Cat no. BAF591         |
| Anti-mouse CD11c (Clone: N418)                            | BioLegend      | Cat no. 117306         |
| Rat Anti-mouse I-A/I-E (Clone: M5/114.15.2)               | BD Biosciences | Cat no. 562366         |
| Anti-mouse Ly6A/E (Sca-1) (Clone: D7)                     | eBiosciences   | Cat no.17-5981-82      |
| Rat anti-mouse CD117/c-kit                                | R&D Systems    | Cat no. FAB1356        |
| Anti-mouse CD115 (Clone: AFS98)                           | eBiosciences   | Cat no. 25-1152-82     |
| Anti-mouse CD16/32 (Clone: 93)                            | Invitrogen     | Cat no.25-0161-82      |
| Anti-mouse CD4 (Clone: GK1.5)                             | BioLegend      | Cat no.100406          |
| Anti-mouse CD206 (Clone:C06C2)                            | BioLegend      | Cat no. 141721         |
| Rat Anti-mouse CD301                                      | BioRad         | Cat no.<br>MCA2392A488 |
| Anti-mouse Nos2 (Clone: CXNFT)                            | Invitrogen     | Cat no. 46-5920-80     |

|                                                  |                          |                     |
|--------------------------------------------------|--------------------------|---------------------|
| Anti Hu/Mo Arg1 (Clone: A1exF5)                  | Invitrogen               | Cat no.48-3697-80   |
| Anti-mouse CD19 (Clone: MB19-1)                  | Invitrogen               | Cat no.11-0191-85   |
| Anti-mouse Ter119 (Clone: Ter-119)               | Invitrogen               | Cat no. 11-5921082  |
| Rat Anti-mouse Ly6G and Ly6C (Clone: RB6-8C5)    | BD Biosciences           | Cat no. 553127      |
| Anti-mouse CD3 (Clone: 17A2)                     | BioLegend                | Cat no. 100204      |
| Anti-mouse Ly6C (Clone: HK1.4)                   | Invitrogen               | Cat no. 45-5932-82  |
| Anti-mouse CD45 (Clone 30-F11)                   | Biolegend                | Cat no.103154       |
| Anti-mouse CD11b (Clone: M1/70)                  | eBiosciences             | Cat no. 56-0112-82  |
| MitoTracker™ Deep Red FM                         | Invitrogen               | Cat no. M22426      |
| Anti-mouse CD34 (Clone: SA376A4)                 | BioLegend                | Cat no.152203       |
| TrueStain fcX (anti-mouse CD16/32) (Clone: 93)   | BioLegend                | Cat no.101320       |
| Anti-mouse CD127 (Clone: A7R34)                  | BioLegend                | Cat no. 135043      |
| Biological Samples                               |                          |                     |
| Fetal Bovine Serum                               | ThermoFisher             | Cat no. 10091148    |
| Chemicals, Peptides, and Recombinant Proteins    |                          |                     |
| Endotoxin free LPS (Escherichia coli Serotype O) | InvivoGen                | Cat no. tlr1-eb1ps  |
| D-Glucose- <sup>13</sup> C6                      | Sigma Aldrich            | Cat no. 389374      |
| Recombinant murine M-CSF                         | Peptotech                | Cat no. 315-03      |
| BD Pharm Lyse Lysing Buffer                      | BD Biosciences           | Cat no. 555899      |
| Taqman Gene Expression Master Mix                | Applied Biosystems       | Cat no.4369016      |
| Trypan Blue solution                             | Sigma                    | T81154-100ML        |
| Streptavidin APC                                 | BD Biosciences           | Cat no. 554067      |
| Streptavidin APC/Fire 750                        | Biolegend                | Cat no.405250       |
| Streptavidin PE                                  | BD Biosciences           | Cat no. 554061      |
| Streptavidin PB                                  | Invitrogen               | Cat no. S11222      |
| Streptavidin PE-Cy5                              | BD Biosciences           | Cat no. 554062      |
| (Ethylenedinitrilo)tetracetic acid (EDTA)        | Thermo Fisher Scientific | Cat no. AM9260G     |
| Fixation/Permeabilization                        |                          |                     |
| Collagenase                                      | Sigma Aldrich            | Cat no. 5138        |
| Trizol LS Reagent                                | Ambion                   | Cat no. 10296028    |
| Chloroform                                       | Alfa Aesar               | Cat no. 32614       |
| Glucose                                          | Sigma Aldrich            | Cat no. G7528       |
| 2-Propanol                                       | Fisher Chemical          | Cat no. A416        |
| Critical Commercial Assays                       |                          |                     |
| Seahorse Bioassay                                | Agilent Technologies     | Cat no.102416       |
| SuperScript IV-VILO Master Mix                   | Thermo Fisher            | Cat no.11766050     |
| RNA Clean and Concentrator Kit                   | Zymo Research            | Cat no. 11-353      |
| Zombie Red Fixable Viability Kit                 | BioLegend                | Cat no.423109       |
| <sup>13</sup> C Glucose                          | Santa Cruz Biotech       | Cat no. 106032-62-6 |
| <sup>13</sup> C Palmitate                        | Sigma-Aldrich            | Cat no. 605573      |
| Cellstripper cell dissociation reagent           | Corning                  | Cat no. 25-056-CI   |



|                                          |                                                                                   |                                                                                                                                                                                                                                                                                                             |
|------------------------------------------|-----------------------------------------------------------------------------------|-------------------------------------------------------------------------------------------------------------------------------------------------------------------------------------------------------------------------------------------------------------------------------------------------------------|
| Western High-fat diet                    | Envigo                                                                            | TD 88137                                                                                                                                                                                                                                                                                                    |
| Deposited Data                           |                                                                                   |                                                                                                                                                                                                                                                                                                             |
| GEO                                      | <a href="https://www.ncbi.nlm.nih.gov/geo/">https://www.ncbi.nlm.nih.gov/geo/</a> | GSE144447                                                                                                                                                                                                                                                                                                   |
| Experimental Models: Organisms/Strains   |                                                                                   |                                                                                                                                                                                                                                                                                                             |
| B6.129P2-Apoetm1Unc/J                    | The Jackson Laboratory                                                            | Stock No: 002052                                                                                                                                                                                                                                                                                            |
| Parasite: <i>Schistosoma mansoni</i>     | Biomedical Research Institute                                                     | <a href="https://www.afbr-bri.org/schistosomiasis/ordering/">https://www.afbr-bri.org/schistosomiasis/ordering/</a>                                                                                                                                                                                         |
| Software and Algorithms                  |                                                                                   |                                                                                                                                                                                                                                                                                                             |
| FlowJo Software X 10.0.7r2               | BD Biosciences                                                                    | <a href="https://www.flowjo.com/solutions/flowjo/downloads/previous-versions">https://www.flowjo.com/solutions/flowjo/downloads/previous-versions</a>                                                                                                                                                       |
| GraphPad Prism 8.2.0                     | GraphPad                                                                          | <a href="https://www.graphpad.com/support/faq/prism-820-release-notes/">https://www.graphpad.com/support/faq/prism-820-release-notes/</a>                                                                                                                                                                   |
| Attune NxT Acoustic Focusing Cytometer   | Invitrogen                                                                        | <a href="https://www.thermofisher.com/us/en/home/life-science/cell-analysis/flow-cytometry/flow-cytometers/attune-acoustic-focusing-flow-cytometer.html">https://www.thermofisher.com/us/en/home/life-science/cell-analysis/flow-cytometry/flow-cytometers/attune-acoustic-focusing-flow-cytometer.html</a> |
| iPathways Guide                          | Advaita                                                                           | <a href="https://advaitabio.com/ipathwayguide/">https://advaitabio.com/ipathwayguide/</a>                                                                                                                                                                                                                   |
| MH Qual                                  | Agilent Technologies, Inc                                                         | <a href="https://www.agilent.com/en/products/software-informatics/masshunter-suite/masshunter/masshunter-software">https://www.agilent.com/en/products/software-informatics/masshunter-suite/masshunter/masshunter-software</a>                                                                             |
| MassHunter Quantitative Analysis B.07.00 | Agilent Technologies, Inc                                                         | <a href="https://www.agilent.com/en/products/software-informatics/masshunter-suite/masshunter/masshunter-software">https://www.agilent.com/en/products/software-informatics/masshunter-suite/masshunter/masshunter-software</a>                                                                             |
| LipidMatch                               | University of Florida                                                             | <a href="http://secim.ufl.edu/secim-tools/lipidmatch/">http://secim.ufl.edu/secim-tools/lipidmatch/</a>                                                                                                                                                                                                     |
| MetaboAnalyst 3.0                        | Xia et al., 2015                                                                  | <a href="http://www.metabolanalyst.ca">http://www.metabolanalyst.ca</a>                                                                                                                                                                                                                                     |
| Other                                    |                                                                                   |                                                                                                                                                                                                                                                                                                             |

|                                         |              |                             |
|-----------------------------------------|--------------|-----------------------------|
| Mgll Taqman Gene Expression Assay       | ThermoFisher | Assay ID:<br>Mm00449274_m1  |
| Slc1a3 Taqman Gene Expression Assay     | ThermoFisher | Assay ID:<br>Mm00600697_m1. |
| Beta actin Taqman Gene Expression Assay | ThermoFisher | Assay ID:<br>Mm00607939_s1  |

542

## 543 LEAD CONTACT AND MATERIALS AVAILABILITY

544 Further information requests should be directed to and will be fulfilled by the Lead Contact,

545 Keke Fairfax ([keke.fairfax@path.utah.edu](mailto:keke.fairfax@path.utah.edu)). These studies generated no new reagents.

546

## 547 EXPERIMENTAL MODEL AND SUBJECT DETAILS

### 548 Parasite and Mouse Models

549 This study was carried out in accordance with the recommendations in the Guide for the Care

550 and Use of Laboratory Animals of the National Institutes of Health. The protocols were

551 approved by the Institutional Animal Care and Use Committees of the University of Utah and

552 Purdue University. Snails infected with *S. mansoni* (strain NMRI, NR-21962) were provided by

553 the Schistosome Research Reagent Resource Center for distribution by BEI Resources, NIAID

554 NIH. Male and female ApoE<sup>-/-</sup> (B6.129P2-Apoetm1Unc/J) were purchased from the Jackson

555 Laboratories and bred at the University of Utah. Mice were housed in pathogen-free conditions

556 and were fed standard rodent chow (2019 rodent chow, Harlan Teklad) until 10-14 days before

557 infection when they were transitioned to a high-fat diet (HFD: 21% milk fat, 0.15% cholesterol:

558 TD 88137 Envigo). Bone marrow chimeras were generated by treating ApoE<sup>-/-</sup> mice that had

559 been on high-fat diet for 4 weeks with 20mg/kg of pharmaceutical grade busulfan for 5 days

560 (total dose of 100mg/kg). On day 6 mice were i.v. injected with 2.5-3 x 10<sup>6</sup> bone marrow cells

561 from either 10-week *S. mansoni* infected or control uninfected ApoE<sup>-/-</sup> mice on high-fat diet.

562 Reconstitution was validated via flow-cytometry at 3-weeks post-transfer and recipient mice  
563 were maintained on high-fat diet for 10-weeks post-reconstitution.

## 564 **METHOD DETAILS**

### 565 ***S. mansoni* infection and glucose tolerance test**

566 ApoE<sup>-/-</sup> female and male mice of 6 weeks of age were exposed percutaneously to 75-90 cercariae  
567 of *S. mansoni* or were mocked infected (as controls). At five- and ten-weeks post-infection mice  
568 were fasted for 5 hours and baseline blood glucose levels were obtained via lateral tail vein nick.  
569 Mice were then administered a single intraperitoneal injection of glucose (2mg/g of body weight,  
570 ultrapure glucose, Sigma G7528). Blood glucose levels were obtained at 20, 60, and 90 min post  
571 injection. Individual data points obtained were analyzed by Area Under Curve (AUC).

572

### 573 **Mouse macrophage culture**

574 Mouse bone marrow-derived macrophages (BMDM) were generated as follows: bone marrow  
575 cells were isolated by centrifugation of bones at >10,000 x g in a microcentrifuge tube for 15  
576 seconds as previously described (Amend et al., 2016). Cells were differentiated in M-CSF  
577 (20ng/mL, Peprotech, Rocky Hill, NJ) in complete macrophage medium (CMM: RPMI1640,  
578 10% FCS, 2mM L-glutamine and 1 IU/mL Pen-Strep for 6 or 7 days. On the last day, cells  
579 were harvested in Cellstripper cell dissociation reagent (Corning) were washed with CMM) and  
580 prepared for downstream assays.

581

### 582 **Glycolytic and phospho-oxidative metabolism measurement (seahorse assay)**

583 BMDM from different conditions (uninfected controls or *S. mansoni* infected) were resuspended  
584 at the same concentration in XF assay media supplemented with 5% FCS and 5mM glucose. The

585 day before the assay, the probe plate was calibrated and incubated at 37 C in a non-CO2  
586 incubator. Resuspended cells were seeded at a concentration of  $1.5 \times 10^5$  cells per well and  
587 incubated for 20-60 minutes in the Prep Station incubator (37 C non-CO2 incubator). Following  
588 initial incubation, XF Running Media (XF assay media with 5% FCS and 10mM Glucose) were  
589 dispensed into each well. OCR and ECAR were measured by an XF96 Seahorse Extracellular  
590 Flux Analyzer following the manufacturer's instructions. For the seahorse assay, cells were  
591 treated with oligomycin (1uM), FCCP (1.5uM), rotenone (100nM) and antimycin A (1uM). Each  
592 condition was performed in 2-3 technical replicates. For determination of palmitate dependent  
593 respiration, BSA-conjugated palmitate (BSA: palmitate = 1:6, molar ratio) was prepared  
594 according to the Seahorse protocol (Seahorse Bioscience). Briefly, 1 mM sodium palmitate  
595 (Sigma Aldrich) was conjugated with 0.17 mM fatty acid free-BSA (Sigma Aldrich) in 150 mM  
596 NaCl solution at 37°C for 1h. Palmitate-BSA was stored in glass vials at -20°C until use. Cells  
597 were incubated as above in glucose limited XF media per manufacturer instructions.

598

### 599 **Flow Cytometry**

600 Livers from uninfected and infected mice were perfused with 1X PBS, mashed and digested in  
601 DMEM 0.5% Collagenase (Sigma) at 37°C for 15 min. Then, livers were mashed and filtered  
602 through a 100 µm metal strainer and digested an additional 15 min. Following second digestion,  
603 the liver contents were strained, washed with DMEM and spun down 1500 rpm for 5 min. The  
604 pellet was lysed with 1X lysis buffer (BD PharmLyse), quenched with 1% FBS DMEM, and  
605 washed to be used in flow cytometry. Surface staining was performed using the following mAb  
606 against mouse antigens: CD45 (30-F11, eBioscience), CD301(BioRad), CD206 (C068C2,  
607 Biolegend), F4/80 (BM8, Biolegend), mouse Mer biotinylated (R&D), CD64(X54-5/7.1, BD).

608 Intracellular antigen staining such as Nos2 (CXNFT, Invitrogen, and C-11, Santa Cruz) and Arg1  
609 (Invitrogen, AlexF5)) was performed using the Intracellular Fixation and Permeabilization  
610 Buffer set (Thermo Fisher Scientific cat. no. 88-8824) per manufacturer's instruction. Further,  
611 bone marrow cells were obtained by centrifugation of bones into tubes at >10000 rpm for 15 s.  
612 Surface staining for bone marrow precursors was performed using the following antibodies:  
613 Ter119, CD19, CD4, CD3, Gr-1, CD11b, Sca-1, CD115, Ly6C, c-Kit, flt3, CD127 and CD16/32.  
614 PBMC from whole blood were obtained following red blood cell lysis and used for flow  
615 cytometry analysis. Surface staining of PBMC was performed using Ter119, CD64, CD11b,  
616 CD115, Ly6C and MitoTracker Red.  
617 Samples were acquired using Attune NxT Focusing Flow Cytometer (Thermo Fisher Scientific)  
618 and analyzed using Flowjo X 10.0.7r2 (FlowJo LLC, Inc.).

619

#### 620 **RNA Isolation and q-RT-PCR**

621 BMDM were stored in Trizol, and RNA isolation was performed as described in the  
622 Immunological Genome Project Total RNA isolation protocol. Next, cDNA was synthesized  
623 from RNA using Superscript IV VILO (ThermoFisher Scientific) for reverse transcription. qPCR  
624 was performed using TaqMan Gene expression assays (Mgll, Slc1a3, beta actin, ThermoFisher)  
625 on an Applied Biosystems Stepone Plus Real-Time PCR System. Beta-Actin assay number  
626 Mm00607939\_s1, mgll assay Mm00449274\_m1, slc1a3 assay Mm00600697\_m1. Relative  
627 expression was calculated using the  $2^{-\Delta\Delta C_t}$  method.

628

#### 629 **Measurement of Cytokines and Inflammatory mediators**

630 For cytokine levels of BMDCs, supernatants were collected at 24 hours post stimulation and  
631 measured with Mouse Cytokine and Chemokine ProcartaPlex 26plex panel (Life Technologies)  
632 per manufacture instructions using a Luminex Magpix system. Nitrite levels in cell culture media  
633 were determined using a Griess reagent kit for nitrite determination (Invitrogen) according the  
634 manufacturer's instructions.

635

### 636 **Untargeted lipidomics**

#### 637 *Sample extraction from serum or cell pellets*

638 Lipids were extracted from serum (50 $\mu$ L) or cell pellets in a combined solution as described in  
639 (Matyash et al., 2008). In detail, samples were combined in solution with 225  $\mu$ L MeOH  
640 containing internal standards (IS; Avanti splash Lipidomix (Lot#12), 10 $\mu$ L each sample) and 750  
641  $\mu$ L methyl tert-butyl ether (MTBE). The samples were sonicated for 1 min, rested on ice for 1  
642 hour, briefly vortexed every 15 min then an addition of 200 $\mu$ L dd-H<sub>2</sub>O was made to induce  
643 phase separation. All solutions were pre-chilled on ice. The sample were then vortexed for 20 s,  
644 rested at room temperature for 10 min, and centrifuged at 14,000 g for 10 min at 4 C. The upper  
645 organic phase was collected and evaporated to dryness under vacuum. Lipid samples were  
646 reconstituted in 200 $\mu$ L IPA and transferred to an LC-MS vial with insert for analysis.

647 Concurrently, a process blank sample was brought forward as well as quality control sample was  
648 prepared by taking equal volumes (10 $\mu$ L per sample) from each sample after final resuspension.

649

#### 650 *LC-MS Methods*

651 Lipid extracts were separated on a Waters Acquity UPLC CSH C18 1.7  $\mu$ m 2.1 x 100 mm  
652 column maintained at 65 °C connected to an Agilent HiP 1290 Sampler, Agilent 1290 Infinity

653 pump, equipped with an Agilent 1290 Flex Cube and Agilent 6530 Accurate Mass Q-TOF dual  
654 ESI mass spectrometer. For positive mode, the source gas temperature was set to 225 °C, with a  
655 gas flow of 11 L/min and a nebulizer pressure of 50 psig. VCap voltage was set at 3500 V,  
656 fragmentor at 110 V, skimmer at 85 V and Octopole RF peak at 750 V. For negative mode, the  
657 source gas temperature was set at 325 °C, with a drying gas flow of 12 L/min and a nebulizer  
658 pressure of 30 psig. VCap voltage is set 3000 V, fragmentor at 125 V, skimmer at 75 V and  
659 Octopole RF peak at 750 V. Reference masses in positive mode ( $m/z$  121.0509 and 922.0098)  
660 were infused with nebulizer pressure at 2 psig, in negative mode reference masses ( $m/z$   
661 1033.988, 966.0007, 112.9856 and 68.9958) were infused with a nebulizer pressure at 5psig.  
662 Samples were analyzed in a randomized order in both positive and negative ionization modes in  
663 separate experiments acquiring with the scan range  $m/z$  100-1700. Mobile phase A consisted of  
664 ACN:H<sub>2</sub>O (60:40  $v/v$ ) in 10 mM ammonium formate and 0.1% formic acid, and mobile phase B  
665 consisted of IPA:ACN:H<sub>2</sub>O (90:9:1  $v/v$ ) in 10 mM ammonium formate and 0.1% formic acid.  
666 The chromatography gradient for both positive and negative modes started at 15% mobile phase  
667 B then increased to 30% B over 2.4 min, then increased to 48% from 2.4-3.0 min, followed by an  
668 increase to 82% B from 3-13.2 min, and then to 99% from 13.2-13.8 min where it was held until  
669 15.4 min and then returned to the initial conditioned and equilibrated for 4 min. Flow was 0.5  
670 mL/min throughout, injection volume was 5  $\mu$ L for positive and 7  $\mu$ L negative mode. Tandem  
671 mass spectrometry is conducted using the same LC gradient at collision energies of 20 V and 40  
672 V.

673

## 674 **Targeted lipidomics**

### 675 *Sample Preparation*

676 Lipids were extracted from cell pellets (500,000 cells) as described in detail above (Matyash et  
677 al., 2008). For targeted lipidomics, lipid extracts were separated on a Waters BEH HILIC column  
678 1.7  $\mu\text{m}$ , 100 mm  $\times$  3 mm column maintained at 60  $^{\circ}\text{C}$  connected to an Agilent HiP 1290  
679 Sampler, Agilent 1290 Infinity pump, and equipped with an Agilent 6490 triple quadrupole  
680 (QqQ) mass spectrometer. Lipids were detected using dynamic multiple reaction monitoring  
681 (dMRM) in negative ion mode. Source gas temperature is set to 225  $^{\circ}\text{C}$ , with a gas flow of 13  
682 L/min and a nebulizer pressure of 30 psi. Sheath gas temperature was 350  $^{\circ}\text{C}$ , sheath gas flow  
683 was 11 L/min, capillary voltage of 4000 V, nozzle voltage was 500 V, high pressure RF was 190  
684 V and low-pressure RF was 120 V. Injection volume was 2  $\mu\text{L}$  and the samples were injected in  
685 a randomized order. Mobile phase A consisted of  $\text{H}_2\text{O}$ , mobile phase B consisted of  $\text{ACN}:\text{H}_2\text{O}$   
686 (96:4 v/v) and both contain 7 mM ammonium acetate. The chromatography gradient started at  
687 100% mobile phase B and decreased to 84% B over 10 min. Post-time was 9 min and the flow  
688 rate was 0.4 mL/min throughout. Collision energies (25 V) and cell accelerator voltages (3 V)  
689 were optimized using lipid standards with dMRM quantifier transitions as  $[\text{M-H}]^- \rightarrow [\text{T2\_RCOO}]^-$   
690 and qualifier transitions of  $[\text{M-H}]^- \rightarrow [\text{T1\_RCOO}]^-$  and  $[\text{M-H}]^- \rightarrow [\text{NL\_T2Ketene}]^-$ .

691

## 692 **Lipid data analysis**

693 The pooled QC samples and process blank samples were injected throughout the sample queue to  
694 ensure the reliability of acquired LC-MS data. Results from LC-MS experiments were collected  
695 using Agilent MassHunter (MH) Workstation and analyzed using the software packages MH  
696 Qual, MH Quant (Agilent Technologies, Inc) and LipidMatch to prepare the data set.  
697 The data table exported from MHQuant was evaluated using Excel where initial lipid targets  
698 were parsed based on the following criteria. Only lipids with relative standard deviation (RSD)



699 less than 30% in QC samples were used for data analysis. Additionally, targets identified in  
700 blanks or double blanks at significant amounts (area under the curve (AUC) target blank/AUC  
701 target QC >30%) were removed from analysis. Lipids were quantitated based on peak area ratios  
702 to the spiked IS of the same or nearest class.

703

## 704 **RNA Sequencing**

### 705 Library Preparation and sequencing

706 The concentration and quality of total RNA samples was first assessed using Agilent 2100  
707 Bioanalyzer. A RIN (RNA Integrity Number) of five or higher was required to pass the quality  
708 control. Then 200 nanograms of RNA per sample were used to prepared dual-indexed strand-  
709 specific cDNA library using KAPA mRNA Hyperprep Kit (Roche). The resulting libraries were  
710 assessed for its quantity and size distribution using Qubit and Agilent 2100 Bioanalyzer. Two  
711 hundred pico molar pooled libraries were utilized per flowcell for clustering amplification on  
712 cBot using HiSeq 3000/4000 PE Cluster Kit and sequenced with 2.75bp paired-end configuration  
713 on HiSeq4000 (Illumina) using HiSeq 3000/4000 PE SBS Kit. A Phred quality score (Q score)  
714 was used to measure the quality of sequencing. More than 90% of the sequencing reads reached  
715 Q30 (99.9% base call accuracy).

716

### 717 Sequence alignment and gene counts

718 The sequencing data were first assessed using FastQC (Babraham Bioinformatics, Cambridge,  
719 UK) for quality control. Then all sequenced libraries were mapped to the mouse genome (UCSC  
720 mm10) using STAR RNA-seq aligner (Dobin et al., 2013) with the following parameter: "--  
721 outSAMmapqUnique 60". The reads distribution across the genome was assessed using bamutils

722 (from ngsutils) (Breese and Liu, 2013). Uniquely mapped sequencing reads were assigned to  
723 mm10 refGene genes using featureCounts (from subread) (Liao et al., 2014) with the following  
724 parameters: “-s 2 -p -Q 10”. Quality control of sequencing and mapping results was summarized  
725 using MultiQC (Ewels et al., 2016). Genes with read count per million (CPM) > 0.5 in more than  
726 2 of the samples were kept. The data was normalized using TMM (trimmed mean of M values)  
727 method. Differential expression analysis was performed using edgeR (McCarthy et al., 2012;  
728 Robinson et al., 2010). False discovery rate (FDR) was computed from p-values using the  
729 Benjamini-Hochberg procedure.

#### 730 Pathway analysis

731 The Data (significantly impacted pathways, biological processes, molecular interactions.) were  
732 analyzed using Advaita Bio's iPathwayGuide (<http://www.advaitabio.com/ipathwayguide>).  
733 Pathway analysis was performed on log<sub>2</sub>-transformed data using Bonferroni-corrected *p*-values.  
734 The data discussed in this publication have been deposited in NCBI's Gene Expression Omnibus  
735 (Edgar *et al.*, 2002) and are accessible through GEO Series accession number GSE  
736 144447(<https://www.ncbi.nlm.nih.gov/geo/query/acc.cgi?acc=GSE144447>)

737

#### 738 **Heavy glucose and heavy palmitate labeling**

739 For metabolomics tracing in Figure 2 BMDM were differentiated in CMM containing normal  
740 glucose. At Day 6 of culture cells were switched to CMM containing <sup>13</sup>C<sub>6</sub>-glucose (Santa Cruz  
741 Biotech) for 24 hours. Cells were harvested and processed as described below. For metabolomics  
742 tracing in figure 5 BMDM were differentiated in CMM containing normal glucose and serum. At  
743 Day 6 of culture cells were switched to CMM containing dialyzed serum and 1 mM <sup>13</sup>C  
744 palmitate (sigma Aldrich) for 36 hours. Cells were harvested and processed as described below.

745  
746

## 747 **Metabolomics**

### 748 *Extraction*

749 Cold 90% methanol (MeOH) solution was added to each sample to give a final concentration of  
750 80% MeOH to each cell pellet. Samples were incubated at -20 °C for 1 hr. After incubation, the  
751 samples were centrifuged at 20,000 x g for 10 minutes at 4 °C. The supernatant was transferred  
752 from each sample tube into a labeled, fresh micro centrifuge tube. The samples were dried *en*  
753 *vacuo*.

754

### 755 *Mass Spectrometry Analysis of Samples*

756 All GC-MS analysis was performed with an Agilent 7200 GC-QTOF and an Agilent 7693A  
757 automatic liquid sampler. Dried samples were suspended in 40 µL of a 40 mg/mL O-  
758 methoxylamine hydrochloride (MOX) (MP Bio #155405) in dry pyridine (EMD Millipore  
759 #PX2012-7) and incubated for one hour at 37 °C in a sand bath. 25 µL of this solution was  
760 added to auto sampler vials followed by the automatic addition of 60 µL of N-methyl-N-  
761 trimethylsilyltrifluoroacetamide (MSTFA with 1%TMCS, Thermo #TS48913) and incubated for  
762 30 minutes at 37 °C. Following incubation, each sample were vortexed and 1 µL of the prepared  
763 sample was injected into the gas chromatograph inlet in the split mode with the inlet temperature  
764 held at 250 °C. A 10:1 split ratio was used for analysis for the majority of metabolites. Any  
765 metabolites that saturated the instrument at the 10:1 split was analyzed at a 50:1 split ratio. The  
766 gas chromatograph had an initial temperature of 60 °C for one minute followed by a 10°C/min  
767 ramp to 325 °C and a hold time of 10 minutes. A 30-meter Agilent Zorbax DB-5MS with 10 m

768 Duraguard capillary column was employed for chromatographic separation. Helium was used as  
769 the carrier gas at a rate of 1 mL/min.

770

#### 771 *Data Analysis*

772 The area under the curve for each isotope was extracted using MHQuant software (Agilent). This  
773 data was exported as a .csv file and isotopically corrected using an in house modified version of  
774 DeuteRater (Naylor et al., 2017)

775

#### 776 **Machine Learning**

777 The selection of the most informative or important features (i.e., the features contributing to the  
778 prediction) was performed using a machine-learning approach involving an elastic-net regressor,  
779 which followed a round of traditional univariate filtering. The process included two steps:

- 780 1. Creating a series of ANOVA models (one for each of the lipid-based features), and pre-  
781 selecting features based on  $\eta^2$  to limit the complexity of the downstream elastic net  
782 model. The uninformative features were rejected and not used in the second step.
- 783 2. Establishing an elastic net regression model via cross-validation and grid-search of the  
784 parameters. The zero coefficients of the model were removed. The top 20 non-zero  
785 coefficients provided ranking for the features in terms of their importance.

786 The elastic net regression attempts to minimize the following functional:

$$787 \hat{\beta} = \underset{\beta}{\operatorname{argmin}} \left( \|y - X\beta\|^2 + \lambda \left( (1 - \alpha) \|\beta\|^2 / 2 + \alpha \|\beta\|_1 \right) \right)$$

788 over a grid of  $\alpha$  and  $\lambda$  values (Zou, 2005). The elastic-net approach linearly combines the  $L_1$  and  
789  $L_2$  penalties used in LASSO (Tibshirani, 1996) and ridge-regression methods (Hoerl, 1970),

790 respectively. Therefore, the elastic net penalty would become LASSO penalty for  $\alpha = 1$  and ridge  
791 penalty for  $\alpha = 0$ . The parameter  $\lambda$  controls the overall strength of the combined penalty term.  
792 The input  $X$  in the model consists of all the molecular features identified, and  $y$  is probability of  
793 observing a particular animal.

794

## 795 **Statistical Analysis**

796 Statistical analyses of data were performed using one-way ANOVA, a non-parametric Mann-  
797 Whitney test, or unpaired Student's t-test depending on the data distribution.  $P \leq 0.05$  were  
798 considered statistically significant. Analyses and graphing were performed using Prism  
799 (GraphPad v8.0) and R-language for statistical computing.

800

801

## 802 **References**

803

804 Amend, S.R., Valkenburg, K.C., and Pienta, K.J. (2016). Murine Hind Limb Long Bone Dissection  
805 and Bone Marrow Isolation. *J Vis Exp*.

806 Anheuser, S., Breiden, B., and Sandhoff, K. (2019). Membrane lipids and their degradation  
807 compounds control GM2 catabolism at intralysosomal luminal vesicles. *J Lipid Res* *60*, 1099-  
808 1111.

809 Baars, A., Oosting, A., Lohuis, M., Koehorst, M., El Aidy, S., Hugenholtz, F., Smidt, H., Mischke,  
810 M., Boekschoten, M.V., Verkade, H.J., et al. (2018). Sex differences in lipid metabolism are  
811 affected by presence of the gut microbiota. *Sci Rep* *8*, 13426.

812 Barron, L., and Wynn, T.A. (2011). Macrophage activation governs schistosomiasis-induced  
813 inflammation and fibrosis. *European journal of immunology* *41*, 2509-2514.

814 Beliard, S., Le Goff, W., Saint-Charles, F., Poupel, L., Deswaerte, V., Bouchareychas, L., Huby, T.,  
815 and Lesnik, P. (2017). Modulation of Gr1(low) monocyte subset impacts insulin sensitivity and  
816 weight gain upon high-fat diet in female mice. *Int J Obes (Lond)* *41*, 1805-1814.

817 Berdan, C.A., Erion, K.A., Burritt, N.E., Corkey, B.E., and Deeney, J.T. (2016). Inhibition of  
818 Monoacylglycerol Lipase Activity Decreases Glucose-Stimulated Insulin Secretion in INS-1  
819 (832/13) Cells and Rat Islets. *PLoS one* *11*, e0149008.

820 Boisvert, W.A., Rose, D.M., Johnson, K.A., Fuentes, M.E., Lira, S.A., Curtiss, L.K., and Terkeltaub,  
821 R.A. (2006). Up-regulated expression of the CXCR2 ligand KC/GRO- $\alpha$  in atherosclerotic

- 822 lesions plays a central role in macrophage accumulation and lesion progression. *The American*  
823 *journal of pathology* 168, 1385-1395.
- 824 Breese, M.R., and Liu, Y. (2013). NGSUtils: a software suite for analyzing and manipulating next-  
825 generation sequencing datasets. *Bioinformatics* 29, 494-496.
- 826 Carroll, R.G., Zaslona, Z., Galvan-Pena, S., Koppe, E.L., Sevin, D.C., Angiari, S., Triantafilou, M.,  
827 Triantafilou, K., Modis, L.K., and O'Neill, L.A. (2018). An unexpected link between fatty acid  
828 synthase and cholesterol synthesis in proinflammatory macrophage activation. *The Journal of*  
829 *biological chemistry* 293, 5509-5521.
- 830 Chella Krishnan, K., Mehrabian, M., and Lusic, A.J. (2018). Sex differences in metabolism and  
831 cardiometabolic disorders. *Curr Opin Lipidol* 29, 404-410.
- 832 Chen, Y., Lu, J., Huang, Y., Wang, T., Xu, Y., Xu, M., Li, M., Wang, W., Li, D., Bi, Y., et al. (2013).  
833 Association of previous schistosome infection with diabetes and metabolic syndrome: a cross-  
834 sectional study in rural China. *The Journal of clinical endocrinology and metabolism* 98, E283-  
835 287.
- 836 Cheng, S.C., Quintin, J., Cramer, R.A., Shepardson, K.M., Saeed, S., Kumar, V., Giamarellos-  
837 Bourboulis, E.J., Martens, J.H., Rao, N.A., Aghajani-rehah, A., et al. (2014). mTOR- and HIF-1alpha-  
838 mediated aerobic glycolysis as metabolic basis for trained immunity. *Science* 345, 1250684.
- 839 Christ, A., Gunther, P., Lauterbach, M.A.R., Duester, P., Biswas, D., Pelka, K., Scholz, C.J.,  
840 Oosting, M., Haendler, K., Bassler, K., et al. (2018). Western Diet Triggers NLRP3-Dependent  
841 Innate Immune Reprogramming. *Cell* 172, 162-175 e114.
- 842 Cnop, M., Havel, P.J., Utzschneider, K.M., Carr, D.B., Sinha, M.K., Boyko, E.J., Retzlaff, B.M.,  
843 Knopp, R.H., Brunzell, J.D., and Kahn, S.E. (2003). Relationship of adiponectin to body fat  
844 distribution, insulin sensitivity and plasma lipoproteins: evidence for independent roles of age  
845 and sex. *Diabetologia* 46, 459-469.
- 846 Cortes-Selva, D., Elvington, A.F., Ready, A., Rajwa, B., Pearce, E.J., Randolph, G.J., and Fairfax,  
847 K.C. (2018). Schistosoma mansoni Infection-Induced Transcriptional Changes in Hepatic  
848 Macrophage Metabolism Correlate With an Athero-Protective Phenotype. *Front Immunol* 9,  
849 2580.
- 850 Dobin, A., Davis, C.A., Schlesinger, F., Drenkow, J., Zaleski, C., Jha, S., Batut, P., Chaisson, M.,  
851 and Gingeras, T.R. (2013). STAR: ultrafast universal RNA-seq aligner. *Bioinformatics* 29, 15-21.
- 852 Doenhoff, M.J., Stanley, R.G., Griffiths, K., and Jackson, C.L. (2002). An anti-atherogenic effect of  
853 Schistosoma mansoni infections in mice associated with a parasite-induced lowering of blood  
854 total cholesterol. *Parasitology* 125, 415-421.
- 855 Douglass, J.D., Zhou, Y.X., Wu, A., Zadroga, J.A., Gajda, A.M., Lackey, A.I., Lang, W., Chevalier,  
856 K.M., Sutton, S.W., Zhang, S.P., et al. (2015). Global deletion of MGL in mice delays lipid  
857 absorption and alters energy homeostasis and diet-induced obesity. *J Lipid Res* 56, 1153-1171.
- 858 Emerging Risk Factors, C., Sarwar, N., Gao, P., Seshasai, S.R., Gobin, R., Kaptoge, S., Di  
859 Angelantonio, E., Ingelsson, E., Lawlor, D.A., Selvin, E., et al. (2010). Diabetes mellitus, fasting  
860 blood glucose concentration, and risk of vascular disease: a collaborative meta-analysis of 102  
861 prospective studies. *Lancet* 375, 2215-2222.
- 862 Ewels, P., Magnusson, M., Lundin, S., and Kaller, M. (2016). MultiQC: summarize analysis results  
863 for multiple tools and samples in a single report. *Bioinformatics* 32, 3047-3048.

864 Fairfax, K.C., Amiel, E., King, I.L., Freitas, T.C., Mohrs, M., and Pearce, E.J. (2012). IL-10R  
865 blockade during chronic schistosomiasis mansoni results in the loss of B cells from the liver and  
866 the development of severe pulmonary disease. *PLoS pathogens* *8*, e1002490.

867 Funk, J.L., Feingold, K.R., Moser, A.H., and Grunfeld, C. (1993). Lipopolysaccharide stimulation  
868 of RAW 264.7 macrophages induces lipid accumulation and foam cell formation.  
869 *Atherosclerosis* *98*, 67-82.

870 Galvan-Pena, S., and O'Neill, L.A. (2014). Metabolic reprogramming in macrophage polarization.  
871 *Front Immunol* *5*, 420.

872 Garaude, J., Acin-Perez, R., Martinez-Cano, S., Enamorado, M., Ugolini, M., Nistal-Villan, E.,  
873 Hervas-Stubbs, S., Pelegrin, P., Sander, L.E., Enriquez, J.A., et al. (2016). Mitochondrial  
874 respiratory-chain adaptations in macrophages contribute to antibacterial host defense. *Nature*  
875 *immunology* *17*, 1037-1045.

876 Girgis, N.M., Gundra, U.M., Ward, L.N., Cabrera, M., Frevert, U., and Loke, P. (2014). Ly6C(high)  
877 monocytes become alternatively activated macrophages in schistosome granulomas with help  
878 from CD4+ cells. *PLoS pathogens* *10*, e1004080.

879 Griffin, C., Lanzetta, N., Eter, L., and Singer, K. (2016). Sexually dimorphic myeloid inflammatory  
880 and metabolic responses to diet-induced obesity. *American journal of physiology. Regulatory,*  
881 *integrative and comparative physiology* *311*, R211-216.

882 Hartman, J., and Frishman, W.H. (2014). Inflammation and atherosclerosis: a review of the role  
883 of interleukin-6 in the development of atherosclerosis and the potential for targeted drug  
884 therapy. *Cardiol Rev* *22*, 147-151.

885 Herbert, D.R., Holscher, C., Mohrs, M., Arendse, B., Schwegmann, A., Radwanska, M., Leeto, M.,  
886 Kirsch, R., Hall, P., Mossman, H., et al. (2004). Alternative macrophage activation is essential  
887 for survival during schistosomiasis and downmodulates T helper 1 responses and  
888 immunopathology. *Immunity* *20*, 623-635.

889 Hinton, W., McGovern, A., Coyle, R., Han, T.S., Sharma, P., Correa, A., Ferreira, F., and de  
890 Lusignan, S. (2018). Incidence and prevalence of cardiovascular disease in English primary care:  
891 a cross-sectional and follow-up study of the Royal College of General Practitioners (RCGP)  
892 Research and Surveillance Centre (RSC). *BMJ Open* *8*, e020282.

893 Hoerl, A.a.K., RW (1970). Ridge Regression: Biased Estimation for Nonorthogonal Problems.  
894 *Technometrics* *12*, 55-67.

895 Hooigeveen, R.M., Nahrendorf, M., Riksen, N.P., Netea, M.G., de Winther, M.P.J., Lutgens, E.,  
896 Nordestgaard, B.G., Neidhart, M., Stroes, E.S.G., Catapano, A.L., et al. (2018). Monocyte and  
897 haematopoietic progenitor reprogramming as common mechanism underlying chronic  
898 inflammatory and cardiovascular diseases. *Eur Heart J* *39*, 3521-3527.

899 Huang, S.C., Everts, B., Ivanova, Y., O'Sullivan, D., Nascimento, M., Smith, A.M., Beatty, W.,  
900 Love-Gregory, L., Lam, W.Y., O'Neill, C.M., et al. (2014). Cell-intrinsic lysosomal lipolysis is  
901 essential for alternative activation of macrophages. *Nature immunology* *15*, 846-855.

902 Humphries, K.H., Izadnegahdar, M., Sedlak, T., Saw, J., Johnston, N., Schenck-Gustafsson, K.,  
903 Shah, R.U., Regitz-Zagrosek, V., Grewal, J., Vaccarino, V., et al. (2017). Sex differences in  
904 cardiovascular disease - Impact on care and outcomes. *Front Neuroendocrinol* *46*, 46-70.

905 Ifrim, D.C., Quintin, J., Joosten, L.A., Jacobs, C., Jansen, T., Jacobs, L., Gow, N.A., Williams, D.L.,  
906 van der Meer, J.W., and Netea, M.G. (2014). Trained immunity or tolerance: opposing

907 functional programs induced in human monocytes after engagement of various pattern  
908 recognition receptors. *Clin Vaccine Immunol* *21*, 534-545.

909 Jung, S.B., Choi, M.J., Ryu, D., Yi, H.S., Lee, S.E., Chang, J.Y., Chung, H.K., Kim, Y.K., Kang, S.G.,  
910 Lee, J.H., et al. (2018). Reduced oxidative capacity in macrophages results in systemic insulin  
911 resistance. *Nat Commun* *9*, 1551.

912 Kannan, Y., Perez-Lloret, J., Li, Y., Entwistle, L.J., Khoury, H., Papoutsopoulou, S., Mahmood, R.,  
913 Mansour, N.R., Ching-Cheng Huang, S., Pearce, E.J., et al. (2016). TPL-2 Regulates Macrophage  
914 Lipid Metabolism and M2 Differentiation to Control TH2-Mediated Immunopathology. *PLoS*  
915 *pathogens* *12*, e1005783.

916 Kaufmann, E., Sanz, J., Dunn, J.L., Khan, N., Mendonca, L.E., Pacis, A., Tzelepis, F., Pernet, E.,  
917 Dumaine, A., Grenier, J.C., et al. (2018). BCG Educates Hematopoietic Stem Cells to Generate  
918 Protective Innate Immunity against Tuberculosis. *Cell* *172*, 176-190 e119.

919 Kim, S.H., and Reaven, G. (2013). Sex differences in insulin resistance and cardiovascular disease  
920 risk. *J Clin Endocrinol Metab* *98*, E1716-1721.

921 Krenkel, O., Hundertmark, J., Abdallah, A.T., Kohlhepp, M., Puengel, T., Roth, T., Branco, D.P.P.,  
922 Mossanen, J.C., Luedde, T., Trautwein, C., et al. (2020). Myeloid cells in liver and bone marrow  
923 acquire a functionally distinct inflammatory phenotype during obesity-related steatohepatitis.  
924 *Gut* *69*, 551-563.

925 Kurylowicz, A., Jonas, M., Lisik, W., Jonas, M., Wicik, Z.A., Wierzbicki, Z., Chmura, A., and  
926 Puzianowska-Kuznicka, M. (2015). Obesity is associated with a decrease in expression but not  
927 with the hypermethylation of thermogenesis-related genes in adipose tissues. *J Transl Med* *13*,  
928 31.

929 Lam, R.S., O'Brien-Simpson, N.M., Holden, J.A., Lenzo, J.C., Fong, S.B., and Reynolds, E.C. (2016).  
930 Unprimed, M1 and M2 Macrophages Differentially Interact with *Porphyromonas gingivalis*. *PLoS*  
931 *one* *11*, e0158629.

932 Langston, P.K., Shibata, M., and Horng, T. (2017). Metabolism Supports Macrophage Activation.  
933 *Front Immunol* *8*, 61.

934 Leentjens, J., Bekkering, S., Joosten, L.A.B., Netea, M.G., Burgner, D.P., and Riksen, N.P. (2018).  
935 Trained Innate Immunity as a Novel Mechanism Linking Infection and the Development of  
936 Atherosclerosis. *Circ Res* *122*, 664-669.

937 Liang, C.P., Han, S., Senokuchi, T., and Tall, A.R. (2007). The macrophage at the crossroads of  
938 insulin resistance and atherosclerosis. *Circ Res* *100*, 1546-1555.

939 Liao, Y., Smyth, G.K., and Shi, W. (2014). featureCounts: an efficient general purpose program  
940 for assigning sequence reads to genomic features. *Bioinformatics* *30*, 923-930.

941 Liu, P.S., Wang, H., Li, X., Chao, T., Teav, T., Christen, S., Di Conza, G., Cheng, W.C., Chou, C.H.,  
942 Vavakova, M., et al. (2017). alpha-ketoglutarate orchestrates macrophage activation through  
943 metabolic and epigenetic reprogramming. *Nat Immunol* *18*, 985-994.

944 Luquain-Costaz, C., Lefai, E., Arnal-Levron, M., Markina, D., Sakai, S., Euthine, V., Makino, A.,  
945 Guichardant, M., Yamashita, S., Kobayashi, T., et al. (2013). Bis(monoacylglycero)phosphate  
946 accumulation in macrophages induces intracellular cholesterol redistribution, attenuates liver-X  
947 receptor/ATP-Binding cassette transporter A1/ATP-binding cassette transporter G1 pathway,  
948 and impairs cholesterol efflux. *Arterioscler Thromb Vasc Biol* *33*, 1803-1811.

949 Marks, J.B., and Raskin, P. (2000). Cardiovascular risk in diabetes: a brief review. *J Diabetes*  
950 *Complications* *14*, 108-115.



951 Matyash, V., Liebisch, G., Kurzchalia, T.V., Shevchenko, A., and Schwudke, D. (2008). Lipid  
952 extraction by methyl-tert-butyl ether for high-throughput lipidomics. *J Lipid Res* *49*, 1137-1146.  
953 McCarthy, D.J., Chen, Y., and Smyth, G.K. (2012). Differential expression analysis of multifactor  
954 RNA-Seq experiments with respect to biological variation. *Nucleic Acids Res* *40*, 4288-4297.  
955 Mehlem, A., Hagberg, C.E., Muhl, L., Eriksson, U., and Falkevall, A. (2013). Imaging of neutral  
956 lipids by oil red O for analyzing the metabolic status in health and disease. *Nat Protoc* *8*, 1149-  
957 1154.  
958 Moran, A., Jacobs, D.R., Jr., Steinberger, J., Steffen, L.M., Pankow, J.S., Hong, C.P., and Sinaiko,  
959 A.R. (2008). Changes in insulin resistance and cardiovascular risk during adolescence:  
960 establishment of differential risk in males and females. *Circulation* *117*, 2361-2368.  
961 Nascimento, M., Huang, S.C., Smith, A., Everts, B., Lam, W., Bassity, E., Gautier, E.L., Randolph,  
962 G.J., and Pearce, E.J. (2014). Ly6Chi monocyte recruitment is responsible for Th2 associated  
963 host-protective macrophage accumulation in liver inflammation due to schistosomiasis. *PLoS*  
964 *pathogens* *10*, e1004282.  
965 Naylor, B.C., Porter, M.T., Wilson, E., Herring, A., Lofthouse, S., Hannemann, A., Piccolo, S.R.,  
966 Rockwood, A.L., and Price, J.C. (2017). Deuterater: a tool for quantifying peptide isotope  
967 precision and kinetic proteomics. *Bioinformatics* *33*, 1514-1520.  
968 Ng, M.K., Jessup, W., and Celermajer, D.S. (2001). Sex-related differences in the regulation of  
969 macrophage cholesterol metabolism. *Curr Opin Lipidol* *12*, 505-510.  
970 Nunemaker, C.S., Chung, H.G., Verrilli, G.M., Corbin, K.L., Upadhye, A., and Sharma, P.R. (2014).  
971 Increased serum CXCL1 and CXCL5 are linked to obesity, hyperglycemia, and impaired islet  
972 function. *J Endocrinol* *222*, 267-276.  
973 Oh, D.Y., Morinaga, H., Talukdar, S., Bae, E.J., and Olefsky, J.M. (2012). Increased macrophage  
974 migration into adipose tissue in obese mice. *Diabetes* *61*, 346-354.  
975 Oiknine, J., and Aviram, M. (1992). Increased susceptibility to activation and increased uptake  
976 of low density lipoprotein by cholesterol-loaded macrophages. *Arterioscler Thromb* *12*, 745-  
977 753.  
978 Opotowsky, A.R., McWilliams, J.M., and Cannon, C.P. (2007). Gender differences in aspirin use  
979 among adults with coronary heart disease in the United States. *J Gen Intern Med* *22*, 55-61.  
980 Paul, F., Arkin, Y., Giladi, A., Jaitin, D.A., Kenigsberg, E., Keren-Shaul, H., Winter, D., Lara-Astiaso,  
981 D., Gury, M., Weiner, A., et al. (2016). Transcriptional Heterogeneity and Lineage Commitment  
982 in Myeloid Progenitors. *Cell* *164*, 325.  
983 Peters, S.A., Huxley, R.R., and Woodward, M. (2014). Diabetes as risk factor for incident  
984 coronary heart disease in women compared with men: a systematic review and meta-analysis  
985 of 64 cohorts including 858,507 individuals and 28,203 coronary events. *Diabetologia* *57*, 1542-  
986 1551.  
987 Pike Winer, L.S., and Wu, M. (2014). Rapid analysis of glycolytic and oxidative substrate flux of  
988 cancer cells in a microplate. *PLoS One* *9*, e109916.  
989 Potteaux, S., Gautier, E.L., Hutchison, S.B., van Rooijen, N., Rader, D.J., Thomas, M.J., Sorci-  
990 Thomas, M.G., and Randolph, G.J. (2011). Suppressed monocyte recruitment drives  
991 macrophage removal from atherosclerotic plaques of Apoe<sup>-/-</sup> mice during disease regression.  
992 *The Journal of clinical investigation* *121*, 2025-2036.

993 Puleston, D.J., Buck, M.D., Klein Geltink, R.I., Kyle, R.L., Caputa, G., O'Sullivan, D., Cameron,  
994 A.M., Castoldi, A., Musa, Y., Kabat, A.M., et al. (2019). Polyamines and eIF5A Hypusination  
995 Modulate Mitochondrial Respiration and Macrophage Activation. *Cell Metab* 30, 352-363 e358.  
996 Qu, D., Liu, J., Lau, C.W., and Huang, Y. (2014). IL-6 in diabetes and cardiovascular  
997 complications. *British journal of pharmacology* 171, 3595-3603.  
998 Robinson, M.D., McCarthy, D.J., and Smyth, G.K. (2010). edgeR: a Bioconductor package for  
999 differential expression analysis of digital gene expression data. *Bioinformatics* 26, 139-140.  
1000 Roth, G.A., Johnson, C., Abajobir, A., Abd-Allah, F., Abera, S.F., Abyu, G., Ahmed, M., Aksut, B.,  
1001 Alam, T., Alam, K., et al. (2017). Global, Regional, and National Burden of Cardiovascular  
1002 Diseases for 10 Causes, 1990 to 2015. *J Am Coll Cardiol* 70, 1-25.  
1003 Rubinow, K.B. (2018). An intracrine view of sex steroids, immunity, and metabolic regulation.  
1004 *Mol Metab* 15, 92-103.  
1005 Rudyk, M.P., Pozur, V.V., Voieikova, D.O., Hurmach, Y.V., Khranovska, N.M., Skachkova, O.V.,  
1006 Svyatetska, V.M., Fedorchuk, O.G., Skivka, L.M., Berehova, T.V., et al. (2018). Sex-based  
1007 differences in phagocyte metabolic profile in rats with monosodium glutamate-induced obesity.  
1008 *Sci Rep* 8, 5419.  
1009 Rull, A., Camps, J., Alonso-Villaverde, C., and Joven, J. (2010). Insulin resistance, inflammation,  
1010 and obesity: role of monocyte chemoattractant protein-1 (or CCL2) in the regulation of  
1011 metabolism. *Mediators Inflamm* 2010.  
1012 Sanya, R.E., Webb, E.L., Zziwa, C., Kizindo, R., Sewankambo, M., Tumusiime, J., Nakazibwe, E.,  
1013 Oduru, G., Niwagaba, E., Kabuubi Nakawungu, P., et al. (2019). The effect of helminth infections  
1014 and their treatment on metabolic outcomes: results of a cluster-randomised trial. *Clinical*  
1015 *infectious diseases : an official publication of the Infectious Diseases Society of America*.  
1016 Shen, S.W., Lu, Y., Li, F., Shen, Z.H., Xu, M., Yao, W.F., Feng, Y.B., Yun, J.T., Wang, Y.P., Ling, W.,  
1017 et al. (2015). The potential long-term effect of previous schistosome infection reduces the risk  
1018 of metabolic syndrome among Chinese men. *Parasite immunology* 37, 333-339.  
1019 Shi, L., Pan, H., Liu, Z., Xie, J., and Han, W. (2017). Roles of PFKFB3 in cancer. *Signal Transduct*  
1020 *Target Ther* 2, 17044.  
1021 Stanley, R.G., Jackson, C.L., Griffiths, K., and Doenhoff, M.J. (2009). Effects of *Schistosoma*  
1022 *mansoni* worms and eggs on circulating cholesterol and liver lipids in mice. *Atherosclerosis* 207,  
1023 131-138.  
1024 Stienstra, R., Netea-Maier, R.T., Riksen, N.P., Joosten, L.A.B., and Netea, M.G. (2017). Specific  
1025 and Complex Reprogramming of Cellular Metabolism in Myeloid Cells during Innate Immune  
1026 Responses. *Cell Metab* 26, 142-156.  
1027 Tacke, F., Alvarez, D., Kaplan, T.J., Jakubzick, C., Spanbroek, R., Llodra, J., Garin, A., Liu, J., Mack,  
1028 M., van Rooijen, N., et al. (2007). Monocyte subsets differentially employ CCR2, CCR5, and  
1029 CX3CR1 to accumulate within atherosclerotic plaques. *The Journal of clinical investigation* 117,  
1030 185-194.  
1031 Tan, Y.Y., Gast, G.C., and van der Schouw, Y.T. (2010). Gender differences in risk factors for  
1032 coronary heart disease. *Maturitas* 65, 149-160.  
1033 Taneja, V. (2018). Sex Hormones Determine Immune Response. *Front Immunol* 9, 1931.  
1034 Tibshirani, R. (1996). Regression shrinkage and selection via the lasso. *J. R. Statist. Soc. B* 58,  
1035 267-288.

- 1036 van der Windt, G.J., Everts, B., Chang, C.H., Curtis, J.D., Freitas, T.C., Amiel, E., Pearce, E.J., and  
1037 Pearce, E.L. (2012). Mitochondrial respiratory capacity is a critical regulator of CD8+ T cell  
1038 memory development. *Immunity* 36, 68-78.
- 1039 Vats, D., Mukundan, L., Odegaard, J.I., Zhang, L., Smith, K.L., Morel, C.R., Wagner, R.A., Greaves,  
1040 D.R., Murray, P.J., and Chawla, A. (2006). Oxidative metabolism and PGC-1beta attenuate  
1041 macrophage-mediated inflammation. *Cell Metab* 4, 13-24.
- 1042 Vernia, S., Cavanagh-Kyros, J., Barrett, T., Jung, D.Y., Kim, J.K., and Davis, R.J. (2013). Diet-  
1043 induced obesity mediated by the JNK/DIO2 signal transduction pathway. *Genes Dev* 27, 2345-  
1044 2355.
- 1045 Willeit, J., Kiechl, S., Egger, G., Oberhollenzer, M., Oberhollenzer, F., Muggeo, M., Poewe, W.,  
1046 and Bonora, E. (1997). The role of insulin in age-related sex differences of cardiovascular risk  
1047 profile and morbidity. *Atherosclerosis* 130, 183-189.
- 1048 Winn, N.C., Jurrissen, T.J., Grunewald, Z.I., Cunningham, R.P., Woodford, M.L., Kanaley, J.A.,  
1049 Lubahn, D.B., Manrique-Acevedo, C., Rector, R.S., Vieira-Potter, V.J., et al. (2019). Estrogen  
1050 receptor-alpha signaling maintains immunometabolic function in males and is obligatory for  
1051 exercise-induced amelioration of nonalcoholic fatty liver. *Am J Physiol Endocrinol Metab* 316,  
1052 E156-E167.
- 1053 Wiria, A.E., Hamid, F., Wammes, L.J., Prasetyani, M.A., Dekkers, O.M., May, L., Kaisar, M.M.,  
1054 Verweij, J.J., Guigas, B., Partono, F., et al. (2015). Infection with Soil-Transmitted Helminths Is  
1055 Associated with Increased Insulin Sensitivity. *PLoS one* 10, e0127746.
- 1056 Wolde, M., Berhe, N., Medhin, G., Chala, F., van Die, I., and Tsegaye, A. (2019). Inverse  
1057 Associations of *Schistosoma mansoni* Infection and Metabolic Syndromes in Humans: A Cross-  
1058 Sectional Study in Northeast Ethiopia. *Microbiol Insights* 12, 1178636119849934.
- 1059 Wolfs, I.M., Stoger, J.L., Goossens, P., Pottgens, C., Gijbels, M.J., Wijnands, E., van der Vorst,  
1060 E.P., van Gorp, P., Beckers, L., Engel, D., et al. (2014). Reprogramming macrophages to an anti-  
1061 inflammatory phenotype by helminth antigens reduces murine atherosclerosis. *FASEB J* 28, 288-  
1062 299.
- 1063 Wong, N.D., Zhao, Y., Patel, R., Patao, C., Malik, S., Bertoni, A.G., Correa, A., Folsom, A.R.,  
1064 Kachroo, S., Mukherjee, J., et al. (2016). Cardiovascular Risk Factor Targets and Cardiovascular  
1065 Disease Event Risk in Diabetes: A Pooling Project of the Atherosclerosis Risk in Communities  
1066 Study, Multi-Ethnic Study of Atherosclerosis, and Jackson Heart Study. *Diabetes Care* 39, 668-  
1067 676.
- 1068 Zhou, Z., Subramanian, P., Sevilimis, G., Globke, B., Soehnlein, O., Karshovska, E., Megens, R.,  
1069 Heyll, K., Chun, J., Saulnier-Blache, J.S., et al. (2011). Lipoprotein-derived lysophosphatidic acid  
1070 promotes atherosclerosis by releasing CXCL1 from the endothelium. *Cell Metab* 13, 592-600.
- 1071 Zou, H.a.H., T (2005). Regularization and variable selection via the elastic net. *Journal of the*  
1072 *Royal Statistical Society* 67, 301-320.

1073

1074

## 1075 **Figure legends**

1076 **Figure 1. Bone marrow derived macrophages (BMDM) from ApoE<sup>-/-</sup> male *S. mansoni***

1077 **infected mice exhibit increased oxygen consumption and mitochondria mass. ApoE<sup>-/-</sup> male**

1078 were fed HFD for 10 days before infection with *S. mansoni*. Ten weeks post infection mice were  
1079 sacrificed and bone marrow cells were harvested and cultured for 7 days under M-CSF. (A)  
1080 Seahorse assay results for OCR of BMDC from infected and uninfected ApoE<sup>-/-</sup> males in basal  
1081 conditions and in response to mitochondrial inhibitors. (B) Quantification (in picomoles per  
1082 minute) of the basal oxygen consumption of BMDM from uninfected or infected ApoE<sup>-/-</sup> HFD  
1083 male mice. (C) Quantification of the spare respiratory capacity of BMDM from uninfected or  
1084 infected ApoE<sup>-/-</sup> HFD male mice (D) Extracellular acidification rate of BMDM from male  
1085 uninfected or infected ApoE<sup>-/-</sup>. (E) Oil Red O relative staining in BMDM from ApoE<sup>-/-</sup> mice (F)  
1086 MitoTracker Red Deep Stain measure by flow cytometry in BMDM from ApoE<sup>-/-</sup> mice.  
1087 Seahorse assay analysis were performed the Seahorse XFe96 instrument. \*p < 0.05; \*\*p < 0.01;  
1088 \*\*\*p < 0.001. Graphs are representative of multiple experiments (2-3), with n>4 per group.

1089

1090 Figure 2.

1091 **BMDM from male *S. mansoni* infected HFD ApoE<sup>-/-</sup> mice have increased TCA cycle usage**  
1092 **and significantly reduced cholesterol esters.** A-E) M $\phi$  were differentiated from bone marrow  
1093 of 10-week infected animals with M-CSF in a 7-day culture in normal glucose and then switched  
1094 to <sup>13</sup>C-labeled glucose for 24 hours. F-H) M $\phi$ s were differentiated with M-CSF in a 7-day culture  
1095 and then total cellular lipids were extracted and analyzed via LC-MS based lipidomic analysis.  
1096 F) PLS-DA derived score from HFD Infected and HFD Uninfected BMDM. G) Plot of lipid  
1097 species from the BMDM of infected and uninfected males on HFD, significantly altered lipid  
1098 species are red and labeled. H) Table of statistical analysis of VIP I) Box whisker plot of  
1099 normalized AUC of cholesterol ester species, which were identified as VIP compounds from the  
1100 PLS-DA analysis. J-L) Bone marrow macrophages were differentiated with M-CSF and mRNA  
1101 sequenced via RNASeq. J) Volcano plot of significantly differentially expressed genes between

1102 BMDM from *S. mansoni* infected uninfected mice. K) iPathway analysis showed distinct profiles  
1103 in BMDM from *S. mansoni* infected, mice. L,M) Total RNA was extracted from biologically  
1104 independent BMDM differentiated in M-CSF for Real-time PCR validation of *mgll* and *slc1a3*  
1105 regulation.

1106 Data in A-I are representative of 3 experiments with 4-6 mice per group in each experiment.  
1107 Data in J and K are representative of sequencing of 2 biologically independent experiments with  
1108 5-6 mice per group. Data in L are from 2 biologically independent experiments with 4-6 mice per  
1109 group.

1110

1111 Figure 3

1112 ***S. mansoni* infection does not protect females from metabolic disease despite inducing**  
1113 **alternative activation in hepatic macrophages.** (A-B) Total body weight and glucose tolerance  
1114 test (GTT) at 10 weeks post-infection. GTT values were analyzed by Area Under the Curve and  
1115 graphed using GraphPad Prims. (C) (D) Flow cytometry analysis of alternative activation  
1116 markers CD206 and CD302 in perfused and digested livers gated on hepatic macrophages  
1117 (CD45<sup>+</sup>CD64<sup>+</sup>MertK<sup>+</sup>) Arg-1 expression in hepatic macrophages from uninfected and infected  
1118 ApoE<sup>-/-</sup> mice Nos-2 expression by flow cytometry in hepatic macrophages 10 weeks post  
1119 infection. (E) Ly6C expression in monocyte from peripheral blood mononuclear cells (PBMC) at  
1120 10-week post infection by flow cytometry (F) MitoTracker Red in CD115<sup>+</sup> monocytes from  
1121 PBMC at 10 weeks post immunization in uninfected and infected ApoE<sup>-/-</sup> mice. (G) Total cell  
1122 counts from bone marrow cells utilizing trypan-blue discrimination of apoptotic cells (H)  
1123 Percentages of CMP (Lin<sup>-</sup>CD127<sup>-</sup>c-Kit<sup>+</sup>Sca-1<sup>-</sup>CD34<sup>+</sup>CD16/32<sup>low</sup>) and GMP (Lin<sup>-</sup>CD127<sup>-</sup>c-  
1124 Kit<sup>+</sup>Sca-1<sup>-</sup>CD34<sup>+</sup>CD16/32<sup>hi</sup>) (I) CMP cell counts in bone marrow ApoE<sup>-/-</sup> (J) GMP cell counts 10

1125 week post infection in ApoE<sup>-/-</sup> mice (K) Flow cytometry analysis of MDP defined as Lin<sup>-</sup>c-  
1126 Kit<sup>+</sup>Sca-1<sup>-</sup>FcγR<sup>low</sup>CD34<sup>+</sup>CD115<sup>+</sup> (L) MDP cell counts in ApoE<sup>-/-</sup>uninfected and infected male  
1127 mice. Graphs are representative from experiments that were performed 3-4 times with n>4.  
1128 Exception is MitoTracker data, which was performed twice, with n>4. Statistical analysis was  
1129 done using unpaired Student's t test, \*p < 0.05; \*\*p < 0.01.

1130

1131 Figure 4.

1132 ***S. mansoni* infection induces sex-specific modulation of oxygen consumption and beta-**  
1133 **oxidation in BMDM.** (A-C) oxygen consumption rate and spare respiratory capacity were  
1134 measured at steady state. D-F) BMDM palmitate dependent oxygen consumption and spare  
1135 respiratory capacity was measured in glucose limiting conditions. G) Oil Red O relative staining  
1136 in BMDM from ApoE<sup>-/-</sup> mice (H) MitoTracker Red Deep Stain measure by flow cytometry in  
1137 BMDM from ApoE<sup>-/-</sup> mice. Seahorse assay analysis were performed the Seahorse XFe96  
1138 instrument. \*p < 0.05; \*\*p < 0.01; \*\*\*p < 0.001. Graphs are representative of multiple  
1139 experiments (2-3), with n>4 per group.

1140

1141 Figure 5.

1142 ***S. mansoni* infection induces significantly different cellular lipid profiles in BMDM from**  
1143 **HFD female and male ApoE<sup>-/-</sup> mice.** A) PLS-DA derived score of LC-MS based lipidomic  
1144 analysis of BMDM from HFD Infected females vs males. B) Box whisker plot of normalized  
1145 AUC of cholesterol ester species, between female and male infected and uninfected HFD ApoE<sup>-/-</sup>  
1146 mice. C) PLS-DA derived score from Female HFD Infected and uninfected BMDM. D) Dot plot  
1147 of lipid species identified in BMDM from infected and uninfected female ApoE<sup>-/-</sup> mice on HFD,

1148 significant lipid species are represented by red dots and labeled. E) Relative quantitation of BMP  
1149 compounds in BMDM from male and female animals with and without *S. mansoni* infection. F-I)  
1150 Macrophages were differentiated with M-CSF in a 7-day culture with normal glucose and serum,  
1151 and then switched to <sup>13</sup>C-labeled palmitate in dialyzed serum for 36 hours. J-N) Culture  
1152 supernatants from BMDM stimulated with LPS for 24 hours were assayed for  
1153 chemokines/cytokines. Data in A-E and J-N are representative of 2 biologically independent  
1154 experiments with 4-8 mice per group. F-I are one experiment with 5-6 mice per group.

1155  
1156

1157

1158 Figure 6.

1159 ***S. mansoni* infection differentially regulates the transcriptomes of BMDM from female and**  
1160 **male ApoE<sup>-/-</sup> mice.** (A) Venn diagram showing upregulated genes in males only, independently  
1161 of infection state and pathway analysis corresponding to the identified genes. (B) Venn diagram  
1162 and pathway analysis of differentially expressed genes in males compared to females. (C) Gene  
1163 ontology map of differentially expressed genes in response to *S. mansoni* infection in male  
1164 compared to female ApoE<sup>-/-</sup> mice on HFD. Sequencing data are from one experiment with 5-6  
1165 mice per group.

1166

1167 **Figure 7. *S. mansoni* induced modulation of male macrophage metabolism is long-lived in**  
1168 **the absence of antigen.** Bone marrow from 10-week *S. mansoni* infected or control ApoE<sup>-/-</sup>  
1169 mice on HFD was transferred into busulfan treated ApoE<sup>-/-</sup> recipients on HFD. A,B) Glucose  
1170 tolerance test (GTT) at 10 weeks post-infection. GTT values were analyzed by Area Under the  
1171 Curve and graphed using GraphPad Prism. C-E) Oxygen consumption rate and spare respiratory

1172 capacity were measured at steady state in 7day BMDM. F) MitoTracker Red Deep Stain measure

1173 by flow cytometry in BMDM. Data is two combined experiments 7-8 animals per group.

1174 Statistical analysis was done using Welch's t-tests.

1175



Figure 1

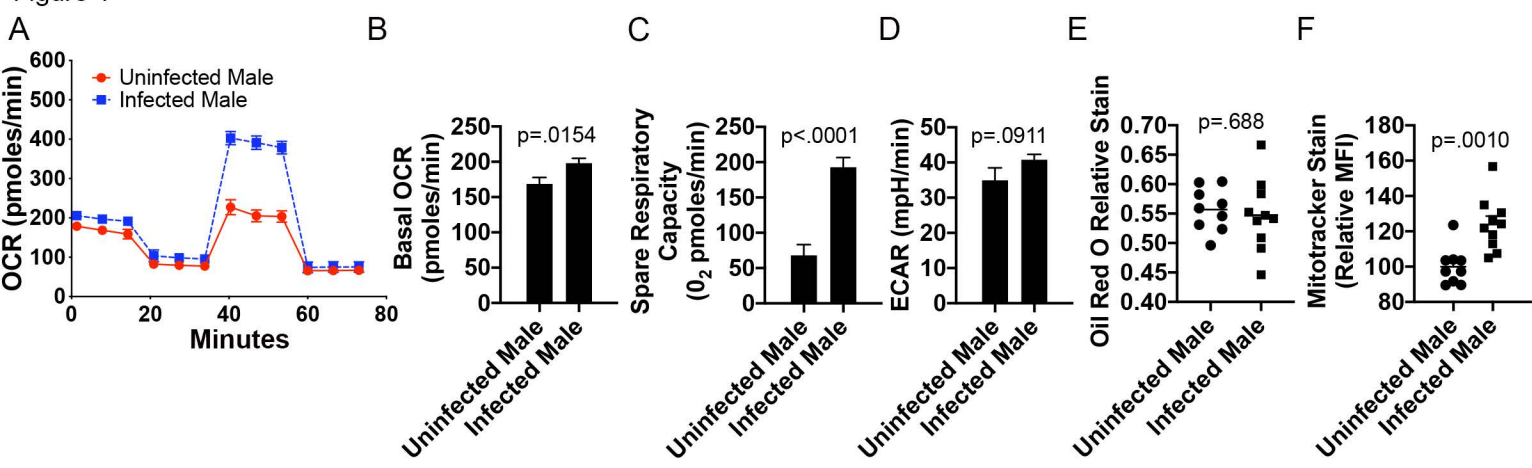

Figure 2

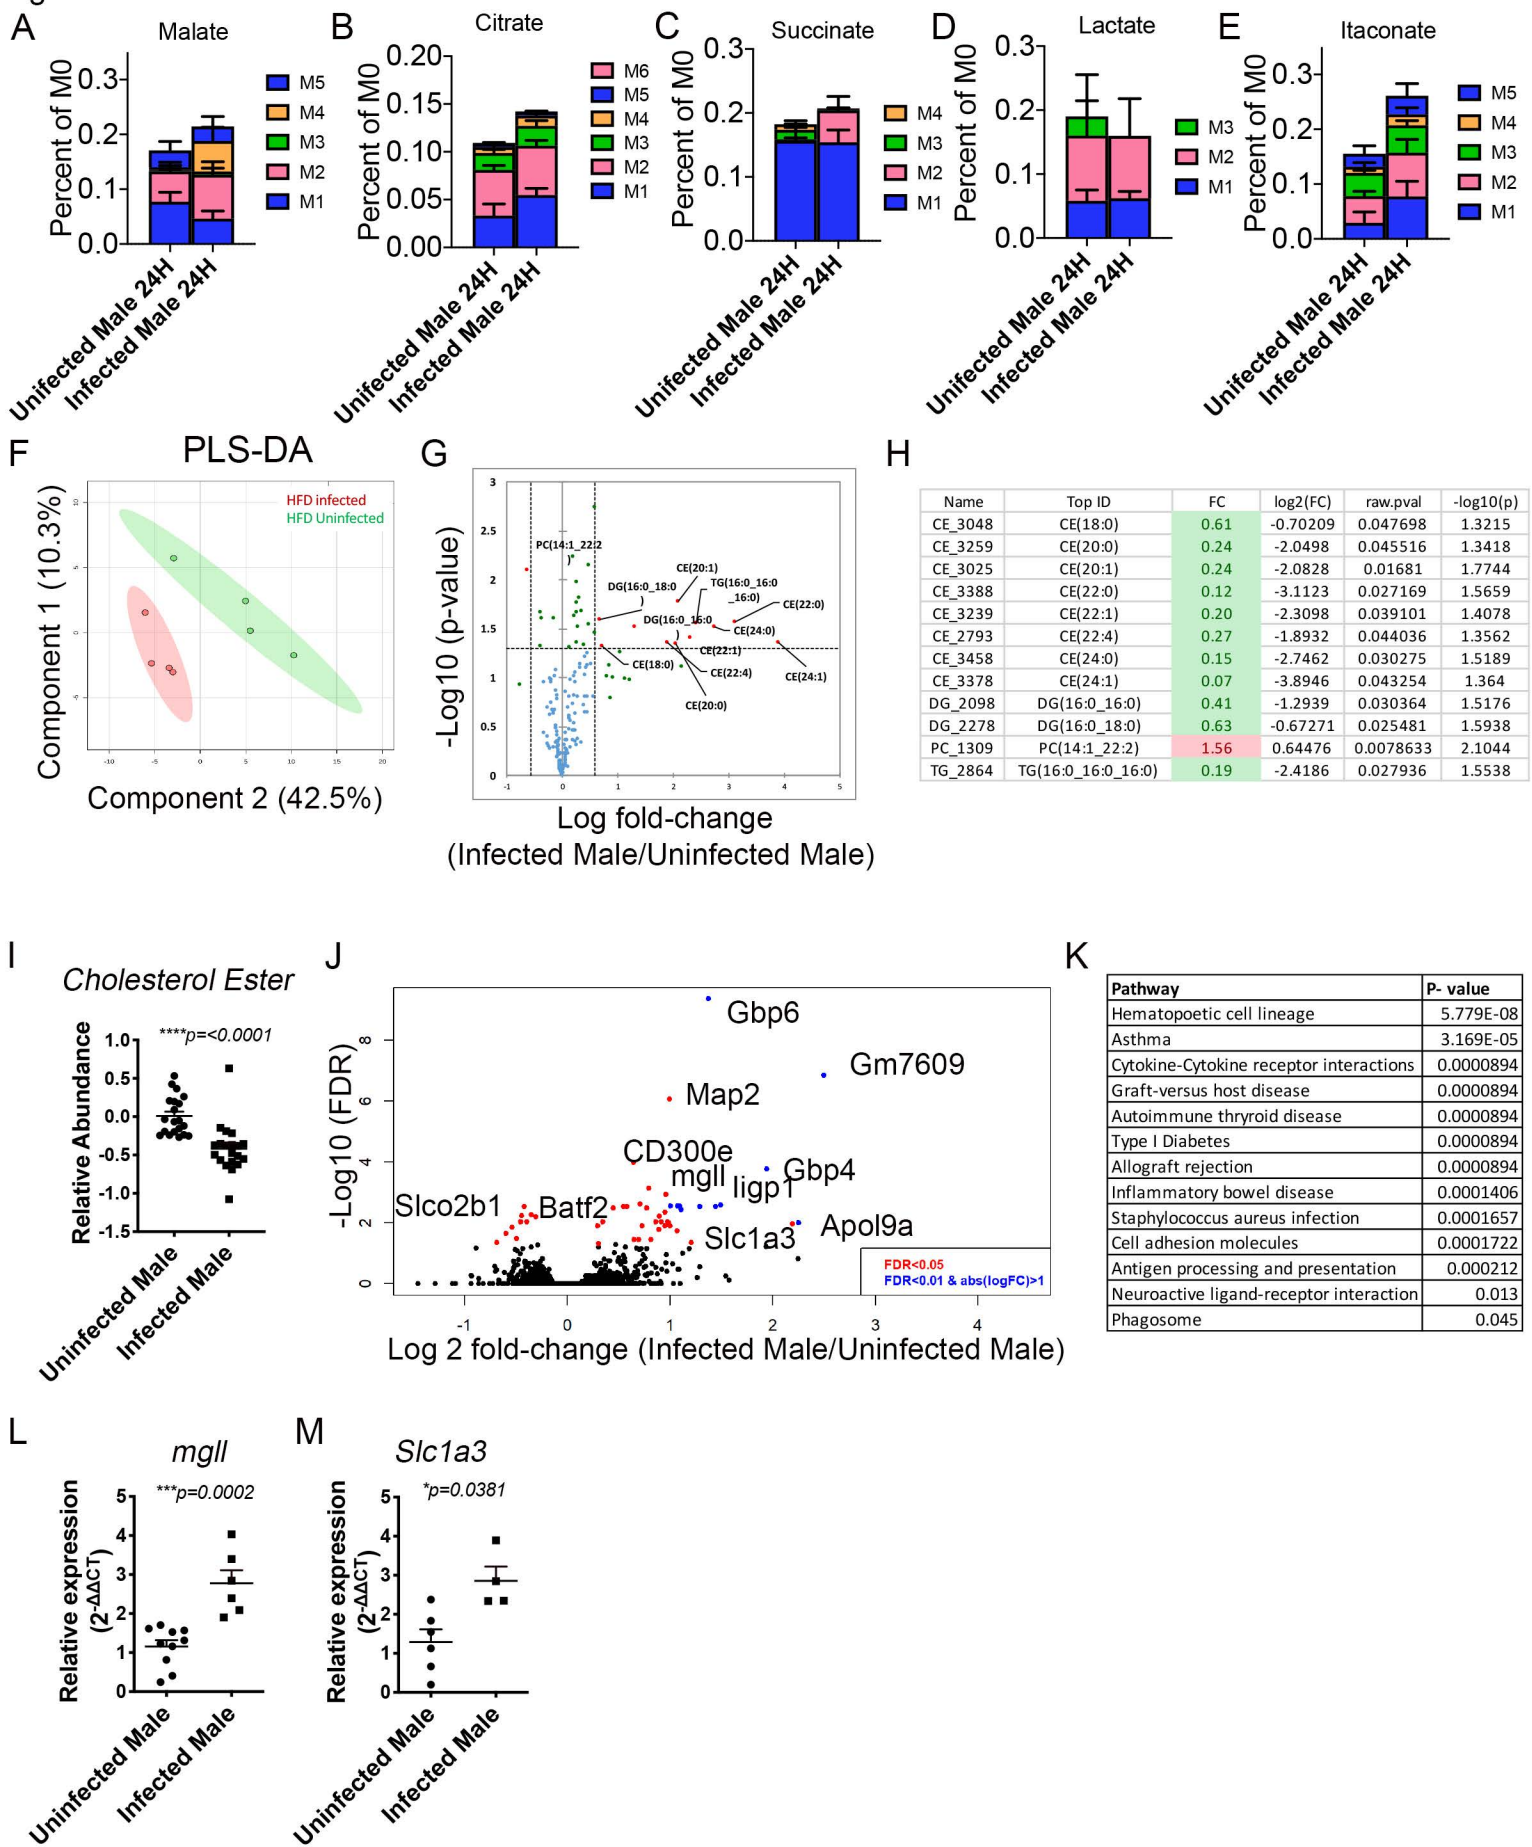

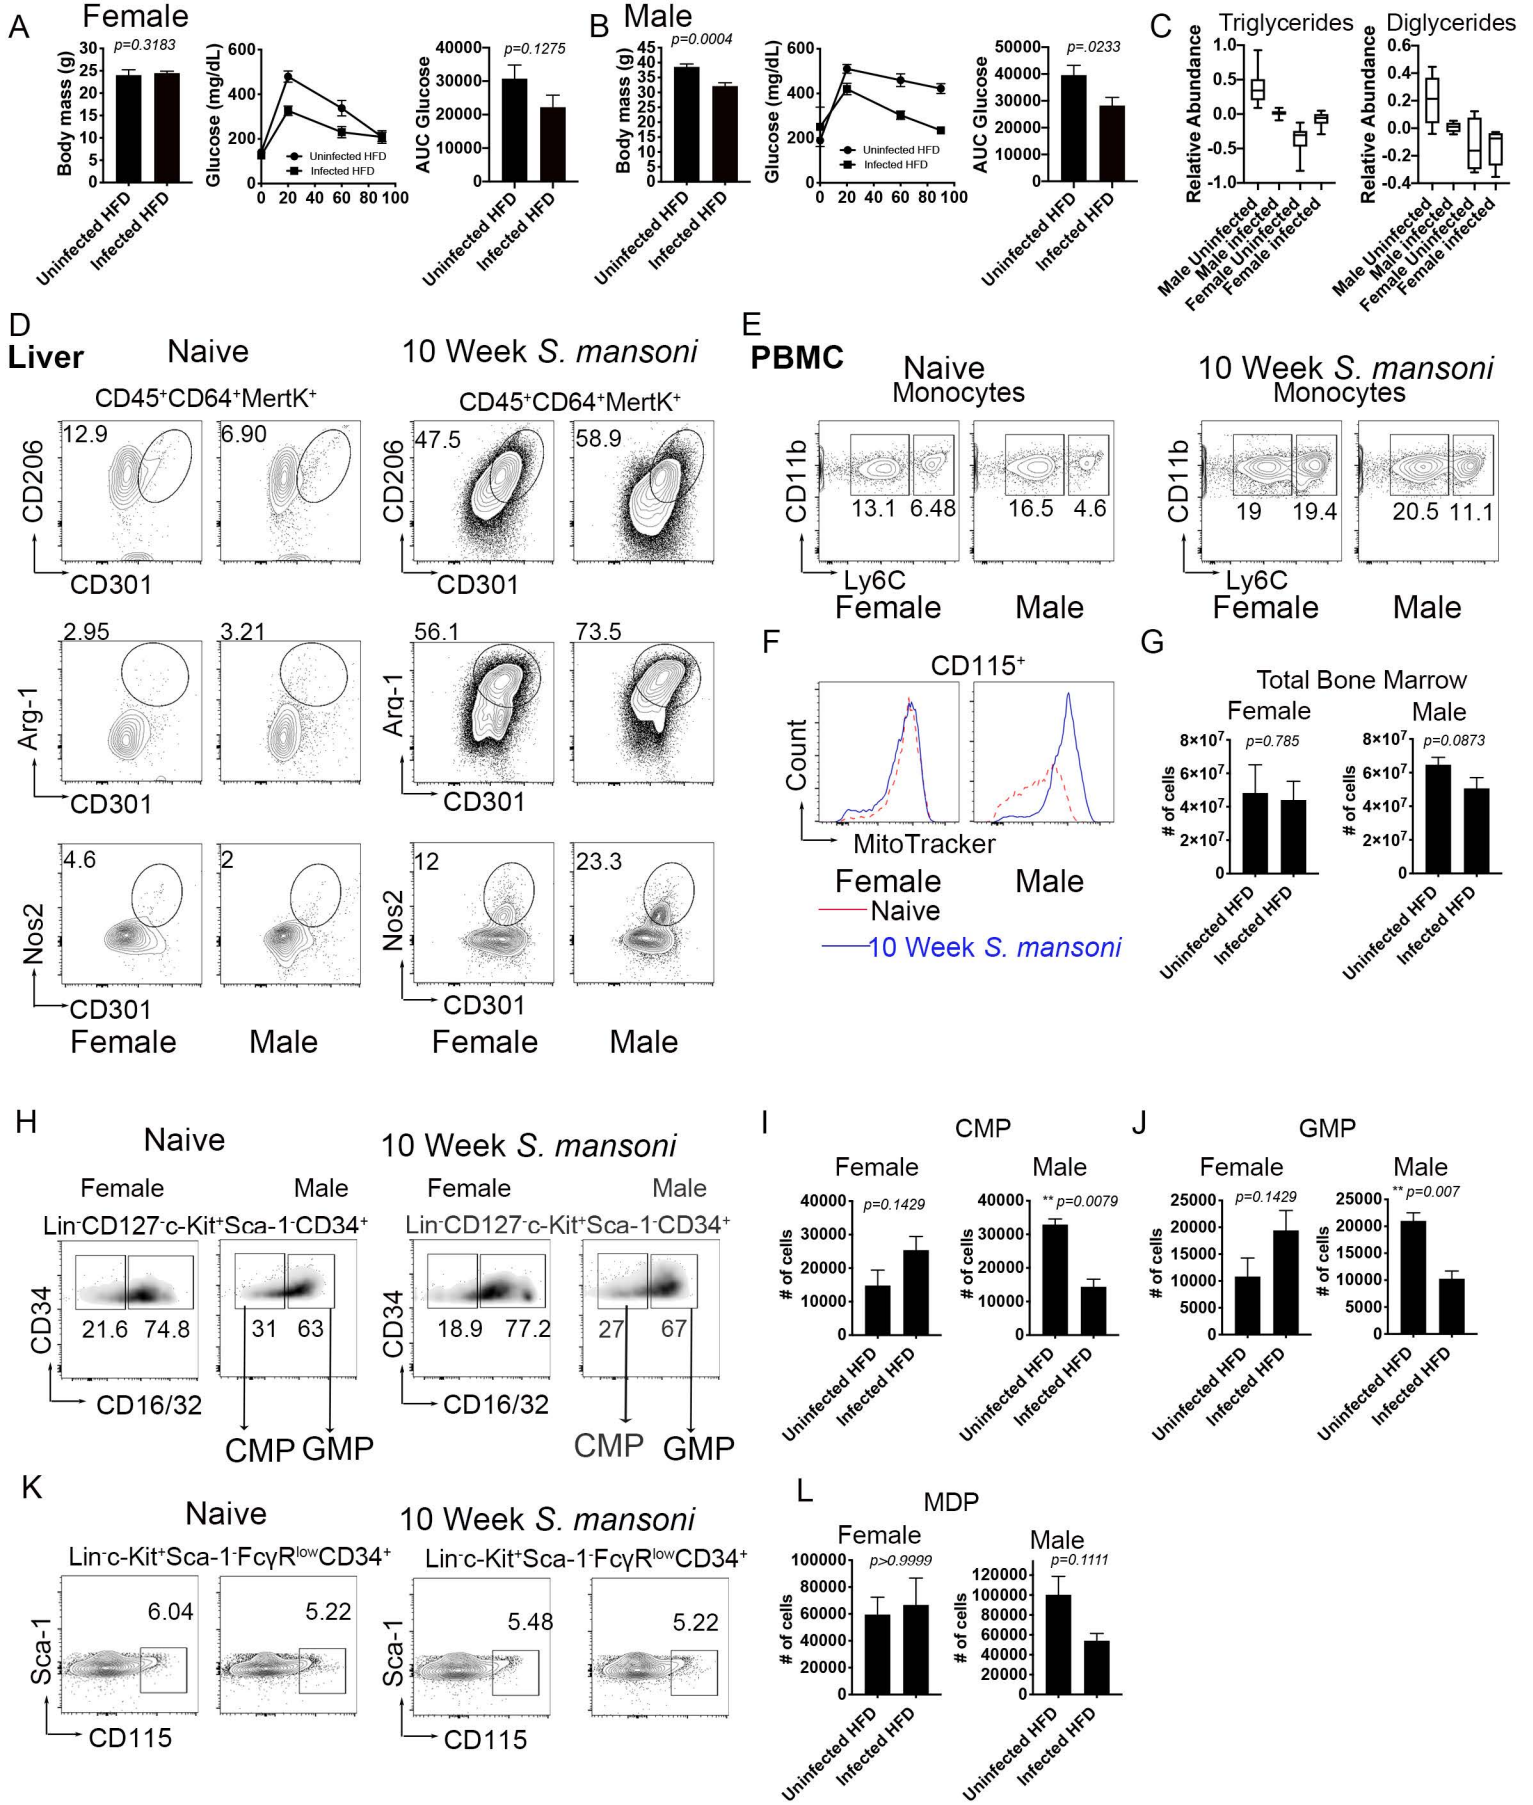

Figure 4

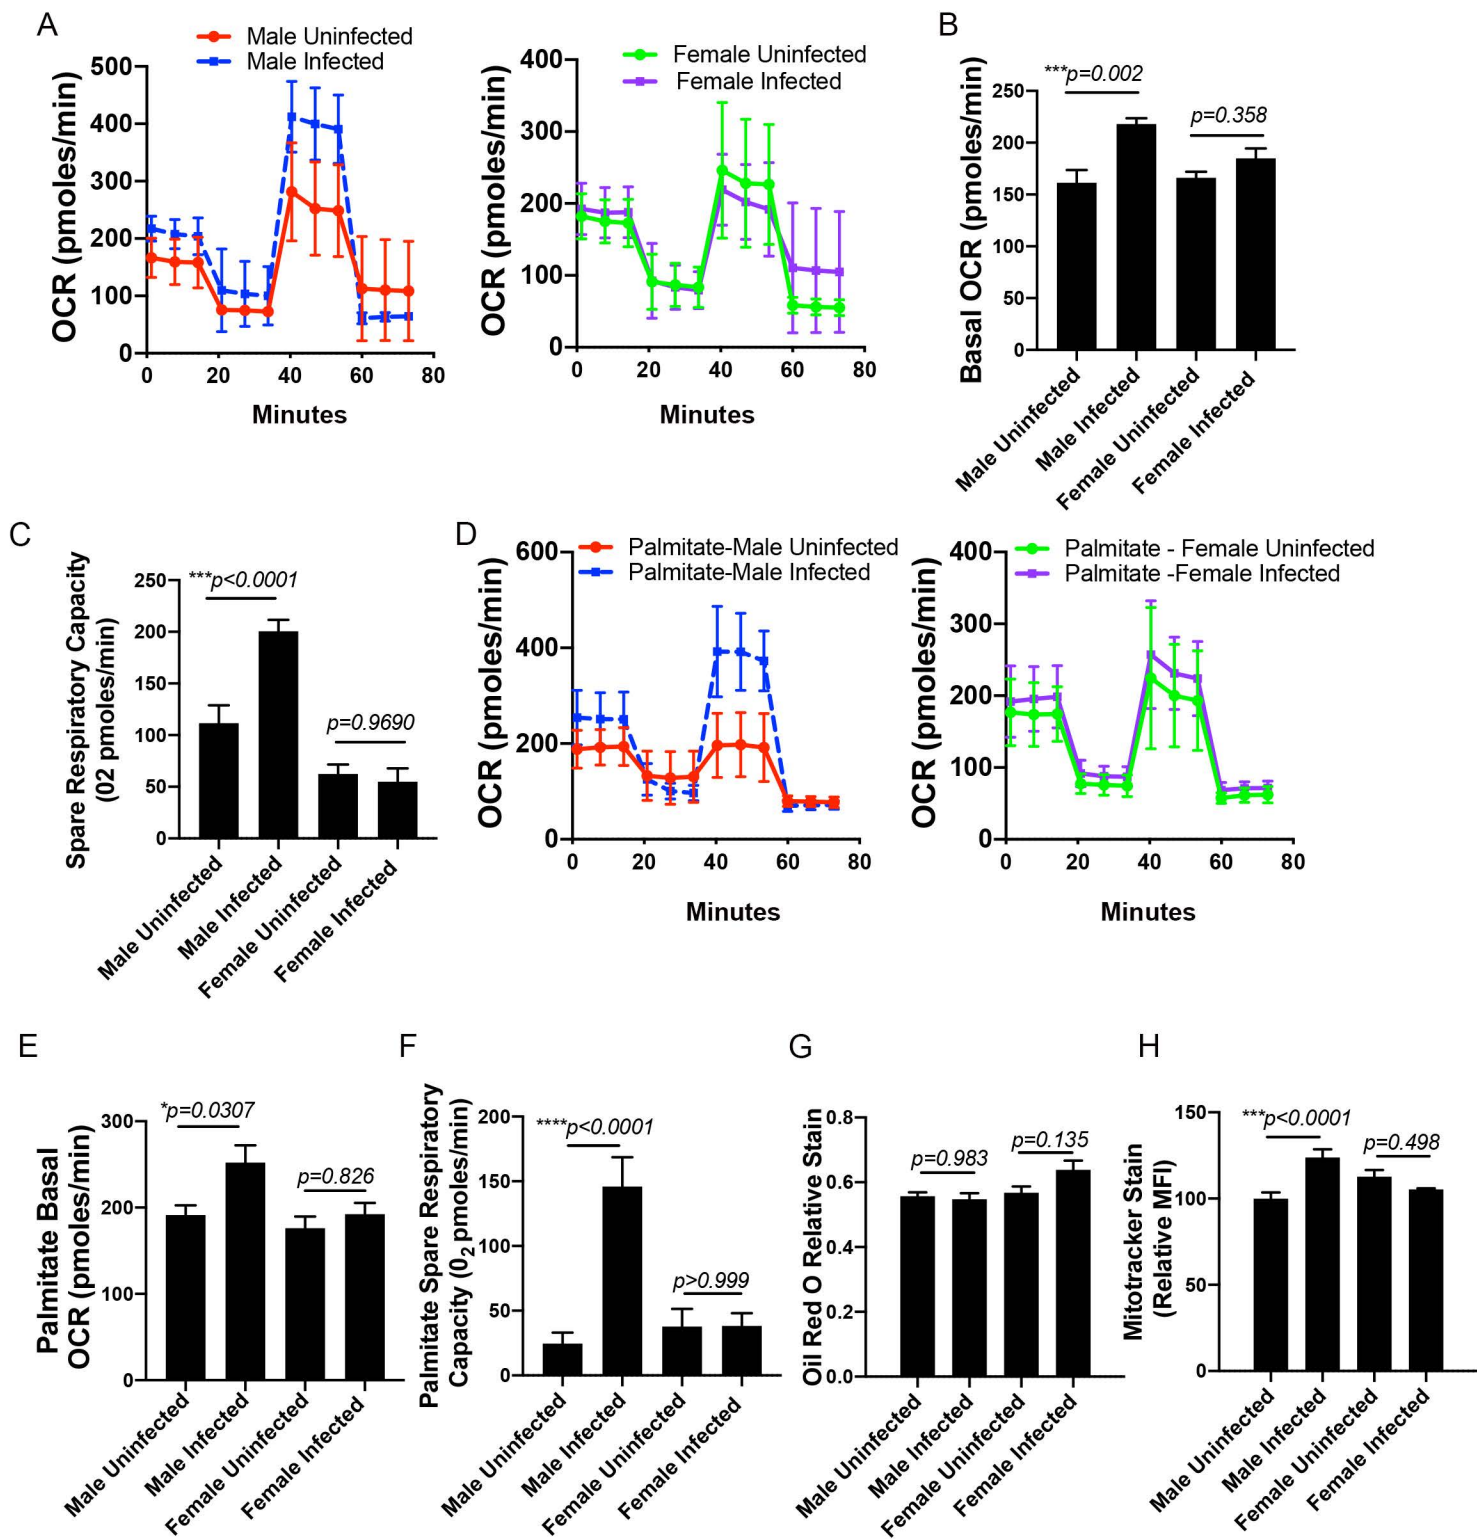

Figure 5

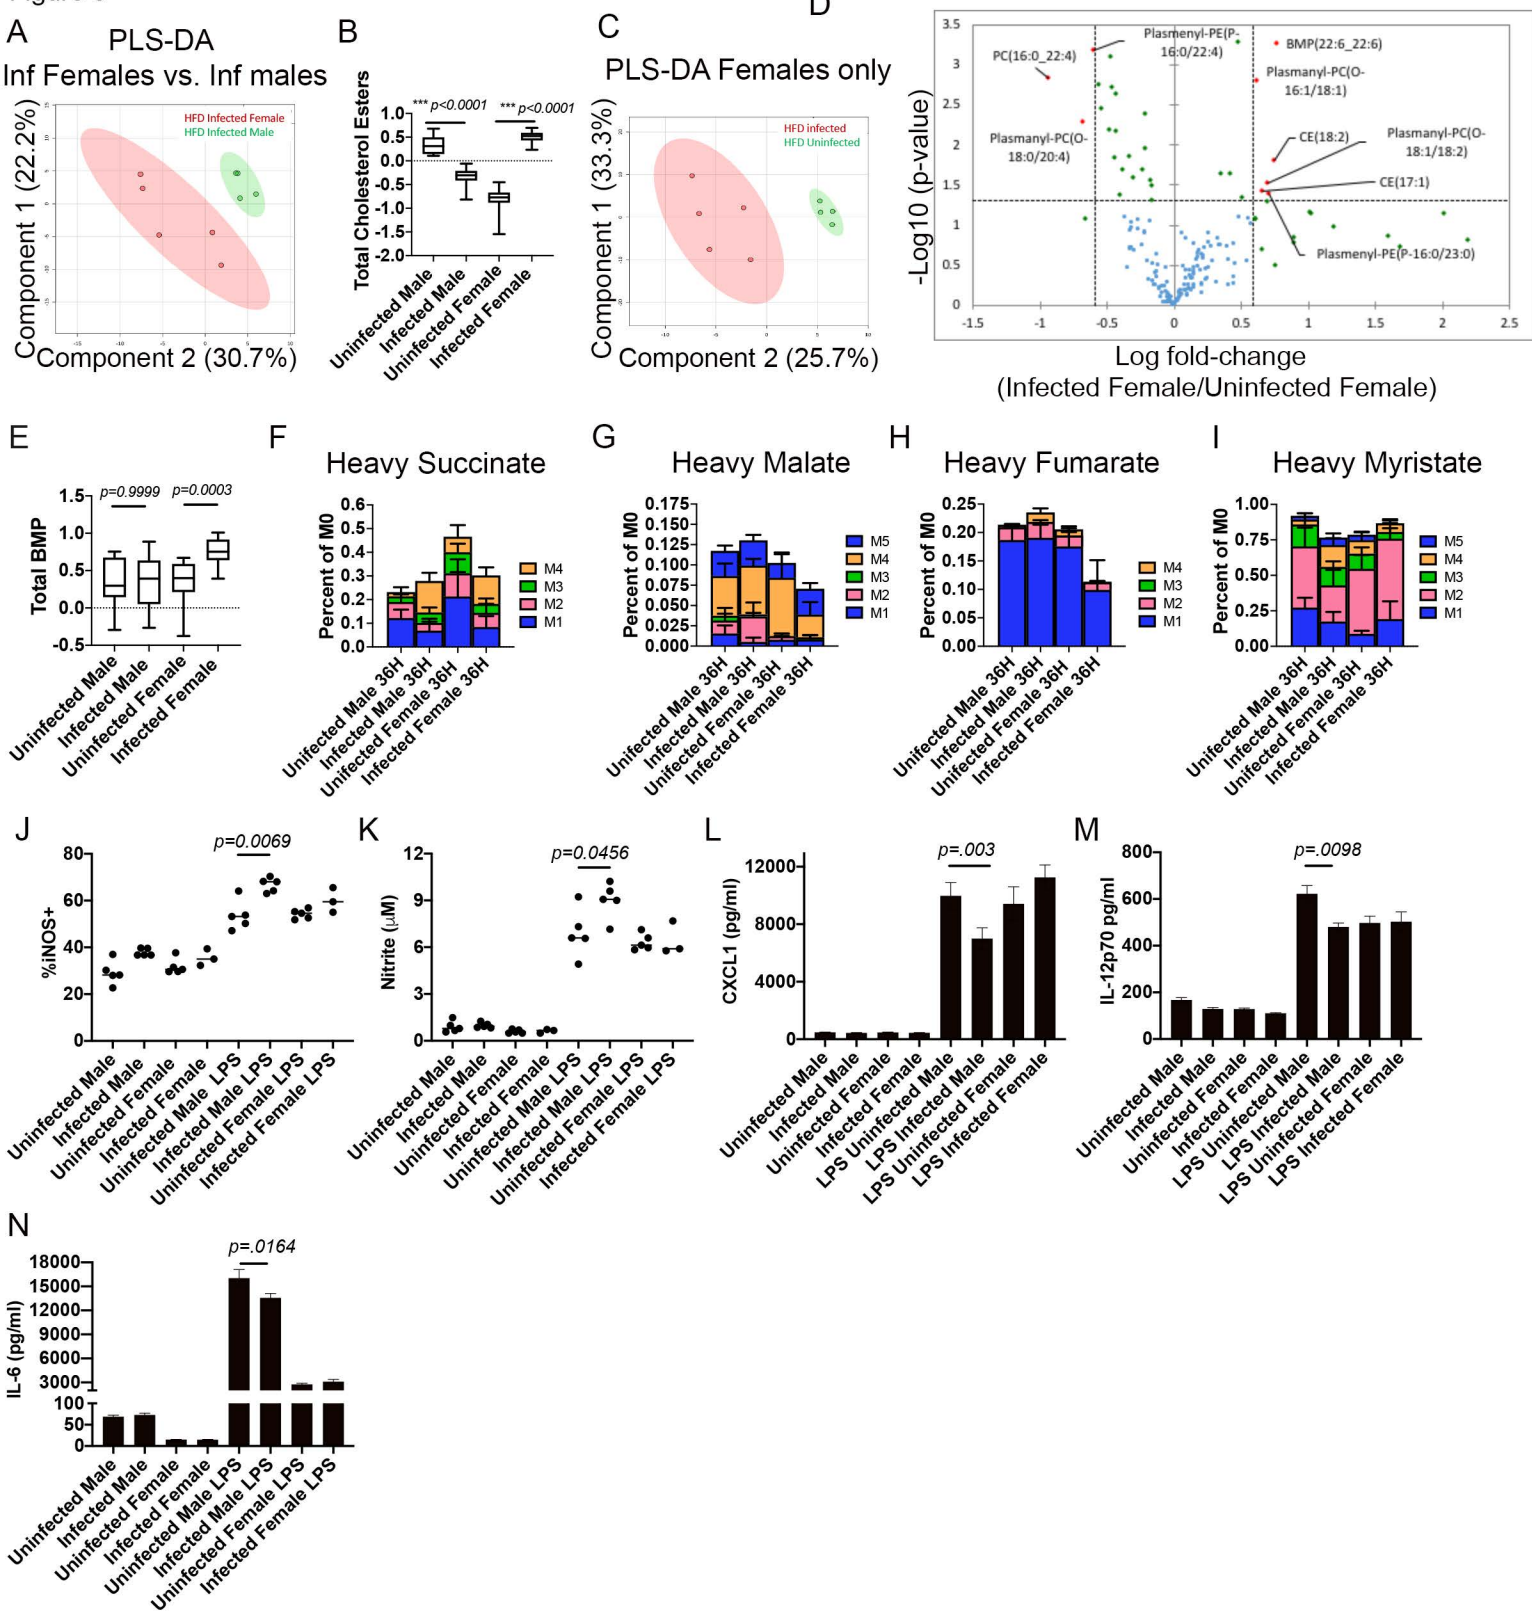

Figure 6

**A** Upregulated genes in males

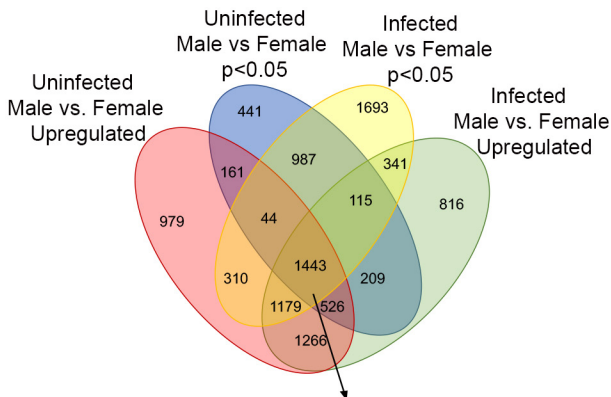

| Pathways                                | Number of genes |
|-----------------------------------------|-----------------|
| Metabolism                              | 238             |
| Innate Immune System                    | 216             |
| Gene expression                         | 183             |
| Metabolism of proteins                  | 149             |
| Class I MHC Mediated Antigen Processing | 85              |
| Cell cycle                              | 76              |
| Vesicle mediated transport              | 72              |
| Unassigned                              | 63              |
| Regulation of TP53 activity             | 52              |
| NK-KappaB Signaling                     | 47              |
| DNA Double-strand break repair          | 42              |
| Organelle biogenesis and maintenance    | 42              |
| TNFR1 Pathway                           | 31              |

**B** Differential regulation in male vs. female

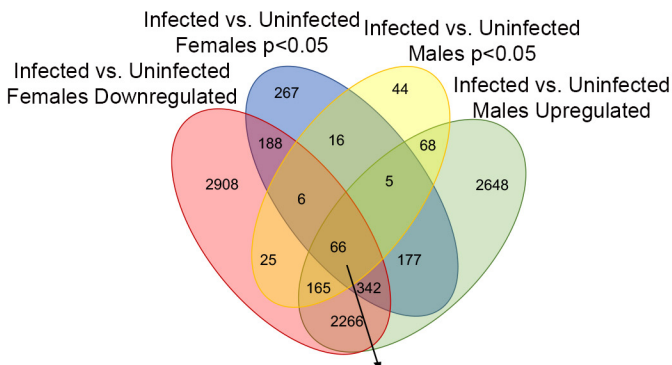

| Pathways                                                        | Number of genes |
|-----------------------------------------------------------------|-----------------|
| Unassigned                                                      | 31              |
| Metabolism                                                      | 10              |
| Hemostasis                                                      | 6               |
| Adaptive immune system                                          | 2               |
| Collagen degradation                                            | 2               |
| Developmental biology                                           | 2               |
| Metabolism of proteins                                          | 2               |
| Neurotransmitter receptors and postsynaptic signal transmission | 2               |
| ROS and RNS production in phagocytes                            | 2               |
| Signal transduction                                             | 2               |

**C** Gene Ontology Map

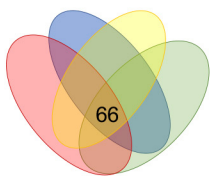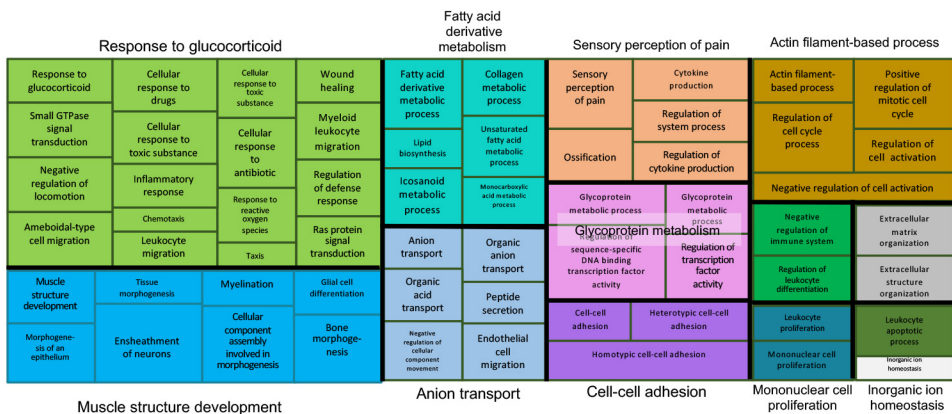

Extracellular matrix organization

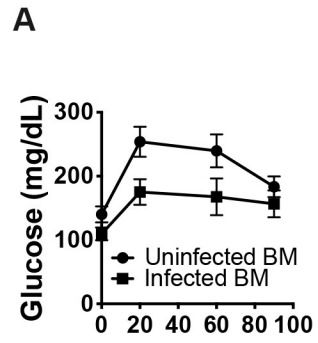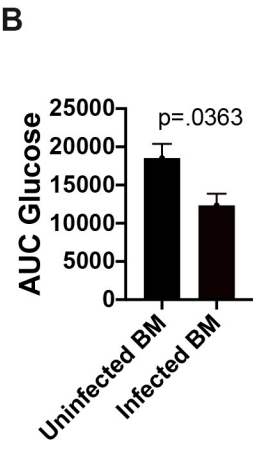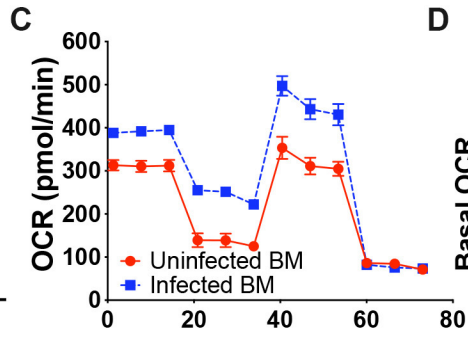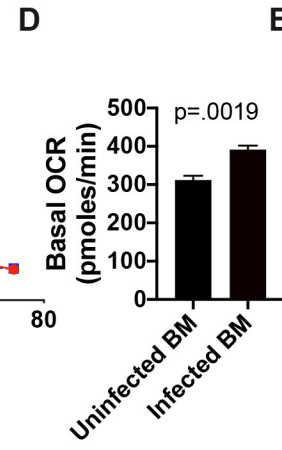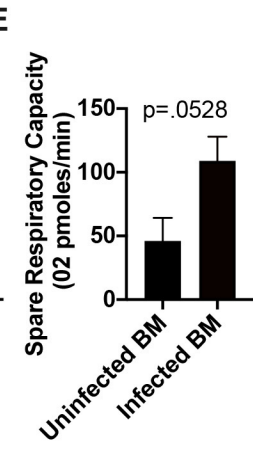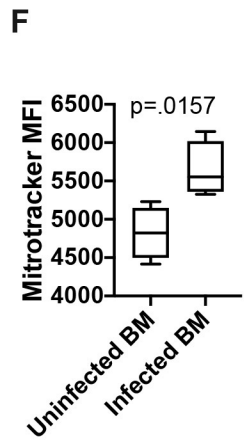

Source: https://www.biorxiv.org/content/10.1101/2020.04.20.050898v2.full.pdf
